# Supplementary material for: Using transcriptomics to examine the physiological status of wild-caught walleye (Sander vitreus)
Source: Atypon-hosted journal article supplement (doi:10.1139/facets-2022-0177), 2023-01-01
Supplement: facets-2022-0177suppla.pdf [file facets-2022-0177suppla.pdf]

## Supplemental materials for:

### Using transcriptomics to examine the physiological status of wild-caught walleye (*Sander vitreus*)

Jennifer D. Jeffrey, Matt J. Thorstensen, Eva Enders, Jason R. Treberg, and Ken M. Jeffries

---

## Methods

### *Differential expression analysis*

Salmon v0.13.3 (Patro et al. 2017) was used to estimate transcript abundances using a previously assembled reference transcriptome for walleye generated by Jeffrey et al. (2020) (Sequence Read Archive Accession SRP150633). The R/Bioconductor package “tximport” (Soneson et al. 2016) was used to estimate counts from abundances at the gene-level that were scaled using the average transcript length, averaged over samples, and library size (i.e., argument `countsFromAbundance = lengthScaledTPM`). Differential expression of genes was examined using the R/Bioconductor package “edgeR” (Robinson et al. 2010). Only genes with at least one count per million across eight samples were considered for further analysis, representing 34,185 genes, 12.9% of genes, and  $> 98.0 \pm 1.9\%$  (mean  $\pm$  standard deviation) of reads per sample. An effective library size was calculated using “`calcNormFactors`” in “edgeR” to normalize library sizes across samples (Robinson and Oshlack 2010). A general linear model was run in “edgeR” with sampling site and year as factors, and quasi-likelihood *F*-tests were used for hypothesis testing (Lun et al. 2016). *A priori* contrasts were designed to compare sampling sites (i.e., Dauphin River vs. Red River, Dauphin River vs. Matheson Island, Matheson Island vs. Red River) within a year and genes were considered differentially expressed at a Benjamini-Hochberg corrected False Discovery Rate (FDR)  $< 0.05$ .

To identify differentially expressed genes that were specific to each sampling site, lists were generated for each sampling site and consisted of genes that were differentially expressed at that site compared to both other sites within a given year (e.g., Red River vs. both Matheson Island and Dauphin

River; Matheson Island vs. both Red River and Dauphin River; Dauphin River vs. both Red River and Matheson Island). The site-specific differentially expressed genes were then identified as being consistently different across years, different only within 2017, or different only within 2018. Annotation information for differentially expressed genes was retrieved from the previously annotated walleye reference transcriptome (Jeffrey et al. 2020). Differentially expressed genes that did not have available annotation information from the reference transcriptome or were identified as uncharacterized or non-vertebrate, were re-blasted using blastx and the non-redundant protein sequences database. Any non-vertebrate genes were removed prior to gene enrichment analysis.

#### *Statistical analysis for selecting candidate genes for qPCR*

Using the RNA-seq data, a set of 20 candidate genes were selected for qPCR using a strategy similar to that of Akbarzadeh et al. (2020) to develop qPCR assays for hypoxia biomarkers in salmonids.

Annotated genes representing consistent differences among sampling sites, across years were subjected to a PCA using the scaled and normalized cpm values and the “FactoMinerR” package in R. The PC associated with the separation of sampling locations was identified and the genes most correlated to this PC axis were determined using the “dimdesc” function in “FactoMinerR”. Candidate genes were selected based on their strong correlation with the PC that was associated with the separation of locations ( $p < 0.05$ ) that were also not significantly correlated with the PC that separated years ( $p > 0.1$ ). To verify separation of locations for the selected genes and to make comparisons to the qPCR data, an additional PCA using only the logCPM values for the 20 candidate genes was run. The PC representing separation by location was identified, and a two-way ANOVA was used to examine the fixed factors of location, year, and location  $\times$  year for the PC scores of this axis. Residuals were examined for normality and equal variance and significant effects were further explored using a Tukey’s HSD post-hoc test as above.

### *Comparison of RNA-seq data with qPCR*

In addition to the Spearman's correlation analysis used to compare the RNAseq and qPCR log<sub>2</sub> fold changes for the 20 candidate genes, additional analyses were carried out to establish whether the individuals examined in the RNA-seq study were representative of the larger sample size assessed using qPCR. Using only individuals from Red River, Matheson Island, and Dauphin River (i.e., analyzed across both platforms), a linear model was developed for each target gene with location, year, the interaction of location and year, the platform, as well as total length and mass as fixed factor. A stepwise Akaike Information Criterion (AIC) was used to compare models and determine the best fit for the data. The "best fit" model was run, and the residuals were examined for normality and equal variance using the "check model" function from the R package, "performance". If the data did not meet the assumptions of the linear model, the data were rank transformed (only for *actn4*). Significant effects of categorical factors were further explored with a Tukey's HSD post-hoc test using the "emmeans" package in R. There were no significant effects of total length or mass when these factors were included in the models.

## **Results**

### *Enrichment analysis for Matheson Island differentially expressed genes*

Fewer genes (180 total and 168 unique) were differentially regulated in walleye from Matheson Island compared to Red River and Dauphin River (Tables S3, S4), and significant enrichment of GO terms were only evident in 2018. In 2018, GO terms related to the immune response were enriched for genes up-regulated in Matheson Island fish compared to fish from the other two locations (Fig. S3a), and included genes such as *tyrosine-protein kinase Lck (lck)* and *ZAP-70 (zap70)* and *lymphocyte cytosolic protein 2 (lcp2)* (Table S5). For genes down-regulated in fish from Matheson Island in 2018, the 'endoplasmic reticulum lumen' GO term was significantly enriched (Fig. S3b), involving genes such as *cytoskeleton-associated protein 4 (ckap4)* and *transport and Golgi organization protein 1 homolog*

(*mia3*) (Table S5). Significant enrichment of GO terms for genes of Matheson Island walleye that were down-regulated compared to Red River fish and up-regulated compared to Dauphin River fish in 2018 included GO terms related to the respiratory electron transport chain (Fig. S3c) and mitochondrial genes associated with complex I (*mt-nd3-6*, *mt-nd4l*) and complex III (*mt-cyp*) (Fig. 5; Table S6).

**Table S1.** Metadata for walleye (*Sander vitreus*) collected from Red River, Matheson Island, and Dauphin River in the Lake Winnipeg system included in the RNA-sequencing analysis.

| <b>Location</b> | <b>Year</b> | <b>Total <i>n</i></b> | <b>Female <i>n</i></b> | <b>Unknown sex <i>n</i></b> | <b>Total length (mm)</b> | <b>Mass (kg)</b> |
|-----------------|-------------|-----------------------|------------------------|-----------------------------|--------------------------|------------------|
| Red River       | 2017        | 8                     | 8                      | 0                           | 666 ± 42                 | 3.29 ± 0.67      |
|                 | 2018        | 8                     | 8                      | 0                           | 662 ± 47                 | 3.68 ± 1.01      |
| Matheson        | 2017        | 8                     | 8                      | 0                           | 613 ± 57                 | 2.30 ± 0.65      |
|                 | 2018        | 8                     | 7                      | 1                           | 650 ± 65                 | 2.80 ± 1.07      |
| Dauphin River   | 2017        | 8                     | 8                      | 0                           | 578 ± 61                 | 1.97 ± 0.40      |
|                 | 2018        | 8                     | 5                      | 3                           | 555 ± 57                 | 1.83 ± 0.68      |

Data are presented as means ± sd.

**Table S2.** Oligonucleotide primers for qPCR in walleye (*Sander vitreus*).

| <b>Gene name</b>                 | <b>Protein name</b>                                   | <b>Forward primer (5'–3')</b> | <b>Reverse primer (5'–3')</b> | <b>Product (bp)</b> | <b>Eff. (%)</b> |
|----------------------------------|-------------------------------------------------------|-------------------------------|-------------------------------|---------------------|-----------------|
| <u>Cytoskeleton organization</u> |                                                       |                               |                               |                     |                 |
| <i>actn4</i>                     | Alpha-actinin-4                                       | CTCTGCGAAAGAGGGTCTTCTC        | GACCGTCCTTCCAGCTAATGTG        | 98                  | 102             |
| <i>actr2</i>                     | Actin-related protein 2                               | ACCCGATGGAGAACGGTATG          | GGTCGGGACCAAAGGTGTAGT         | 75                  | 107             |
| <i>arf6</i>                      | ADP-ribosylation factor 6                             | ATCCTGATCTTCGCCAACAAA         | GGCCTAGCTTCTCCTGGATCTC        | 73                  | 99              |
| <i>arhgdia</i>                   | Rho GDP-dissociation inhibitor 1                      | GCGGCACCTACACCATCAA           | CACCAATCCCAGGAGAGATGA         | 70                  | 104             |
| <i>cdc42</i>                     | Cell division control protein 42 homolog              | AGACAGCAACACGATCGAGAAG        | TGAGCTCACGAGCCAGCTT           | 86                  | 99              |
| <i>cot11</i>                     | Coactosin-like protein                                | CCTGGATCGGTGAGAACATCA         | CTTTGACCAGCGCCTTGTC           | 69                  | 103             |
| <i>fam49b (cyrib)</i>            | Protein FAM49B (CYFIP-related Rac1 interactor B)      | GCACCTGGAGCAGAAACAGTCT        | GCAGCGTGAAGTGCAGGAT           | 62                  | 104             |
| <i>pfn2</i>                      | Profilin-2                                            | CAGCTACTGCATGCACCTGAA         | GCCTTGCCGACACAGATGT           | 66                  | 99              |
| <u>Stress response</u>           |                                                       |                               |                               |                     |                 |
| <i>akr1a1b</i>                   | Aldo-keto reductase family 1 member A1-B              | AGCAGTTATTTGGGCATTGGA         | CCAAATGTCTCATGCAGTGCTT        | 102                 | 91              |
| <i>dnajc9</i>                    | DnaJ homolog subfamily C member 9                     | TACGAGGTGCTCGGCATCA           | TGGACTTTCAGCGACACTTTGT        | 80                  | 94              |
| <i>gpx1</i>                      | Glutathione peroxidase 1                              | CATGAGCGGTACACCAGCAA          | TTCTCCTGGTGGCCGA ACT          | 71                  | 91              |
| <i>slc25a24</i>                  | Calcium-binding mitochondrial carrier protein SCaMC-1 | GGAGGGAGCATTTTCTGTTTAA        | CACCAATATCCAGCACCGTAGA        | 87                  | 101             |
| <i>ube2j1</i>                    | Ubiquitin-conjugating enzyme E2 J1                    | TCATCCAGACAGGCAAGTGAGA        | TGCAGACGTGGAGGTGTCTTC         | 81                  | 107             |
| <u>DNA repair</u>                |                                                       |                               |                               |                     |                 |
| <i>rpa2</i>                      | Replication protein A 32 kDa subunit                  | TCCGGGCACGTATGTCAAA           | GCCACGATAGATCGGTGGTT          | 66                  | 97              |

---

| <u>Golgi protein transport</u> |                                                                      |                        |                       |     |     |
|--------------------------------|----------------------------------------------------------------------|------------------------|-----------------------|-----|-----|
| <i>ap1s1</i>                   | AP-1 complex subunit<br>sigma-1A                                     | CAGGGAGCTGATGCAGATAGTG | GGTCCCTCCATTCGAGGAA   | 68  | 100 |
| <i>eipr1</i>                   | EARP-interacting protein<br>homolog                                  | AAGTTCACCTCGGGCAAGTG   | CTCGTATGGCCGTGTCATTG  | 76  | 104 |
| <u>Immunity</u>                |                                                                      |                        |                       |     |     |
| <i>tnfaip8l2</i>               | Tumor necrosis factor,<br>alpha-induced protein 8-<br>like protein 2 | CACCAAAAGCTCTGTCCAAATG | GCGGTACAGTTCGTCCAGGAT | 67  | 104 |
| <u>Ion transport</u>           |                                                                      |                        |                       |     |     |
| <i>mcu</i>                     | Calcium uniporter protein,<br>mitochondrial                          | TGCTTACACGCCAGGAGTATGT | CTTTTCACCCCCTTGTGGAA  | 79  | 95  |
| <i>cnm4</i>                    | Metal transporter CNNM4                                              | GGTGTCATGGCACTCAATGC   | GGTTCAACCCGCTGACGTTA  | 67  | 106 |
| <u>Signaling pathways</u>      |                                                                      |                        |                       |     |     |
| <i>dgka</i>                    | Diacylglycerol kinase<br>alpha                                       | GCTGCACCTGTTGCAAGTACA  | GCGACAACCAATCTTCGGTTT | 104 | 107 |

---

**Table S3.** Number of differentially regulated genes with annotation information, the number of unique genes, and the number of enriched genes following enrichment analysis of gene ontology terms for walleye (*Sander vitreus*) sampled across the Lake Winnipeg system in 2017 and 2018.

| <b>Location</b>      | <b>Contrast</b> | <b>Regulation</b>    | <b>Annotated genes</b> | <b>Unique genes</b> | <b>Enriched genes</b> |   |
|----------------------|-----------------|----------------------|------------------------|---------------------|-----------------------|---|
| Red River            | Both years      | Up                   | 43                     | 40                  | 6                     |   |
|                      |                 | Down                 | 104                    | 90                  | 50                    |   |
|                      | 2017 only       | Up                   | 89                     | 82                  | 14                    |   |
|                      |                 | Down                 | 641                    | 582                 | 451                   |   |
|                      | 2018 only       | Up                   | 248                    | 234                 | 0                     |   |
|                      |                 | Down                 | 224                    | 206                 | 126                   |   |
|                      | Matheson Island | Both years           | Up                     | 0                   | 0                     | 0 |
|                      |                 |                      | Down                   | 4                   | 3                     | 0 |
| Up vs. R; Down vs. D |                 |                      | 1                      | 1                   | 0                     |   |
| 2017 only            |                 | Up                   | 27                     | 27                  | 0                     |   |
|                      |                 | Down                 | 22                     | 22                  | 0                     |   |
|                      |                 | Up vs. R; Down vs. D | 3                      | 3                   | 0                     |   |
|                      |                 | Down vs. R; Up vs. D | 2                      | 2                   | 0                     |   |
| 2018 only            |                 | Up                   | 33                     | 32                  | 8                     |   |
|                      |                 | Down                 | 35                     | 34                  | 4                     |   |
|                      |                 | Up vs. R; Down vs. D | 33                     | 26                  | 0                     |   |
|                      |                 | Down vs. R; Up vs. D | 20                     | 18                  | 5                     |   |
| Dauphin River        |                 | Both years           | Up                     | 34                  | 30                    | 4 |
|                      | Down            |                      | 9                      | 9                   | 0                     |   |
|                      | 2017 only       | Up                   | 64                     | 62                  | 0                     |   |
|                      |                 | Down                 | 25                     | 25                  | 0                     |   |
|                      | 2018 only       | Up                   | 417                    | 373                 | 176                   |   |
|                      |                 | Down                 | 331                    | 312                 | 25                    |   |

R, Red River; D, Dauphin River



**Table S4.** Differentially regulated genes in walleye (*Sander vitreus*) sampled from the Red River (R) Matheson Island (M), and Dauphin River (D) in 2017 (17) and 2018 (18). Log<sub>2</sub> fold-change (LogFC), false discovery rate (FDR), annotation source, and uniprot ID, as well as E value, percent ID, and transcript sequence are provided in the .xlsx file.

**Table S5.** Differentially regulated genes associated with significantly enriched gene ontology (GO) terms (biological processes, BP; molecular functions, MF; cellular components, CC) for walleye (*Sander vitreus*) sampled from the Red River (R) Matheson Island (M), and Dauphin River (D) in 2017 (17) and 2018 (18). The GO category (GO cat.; biological process, BP; molecular function, MF; cellular component, CC), GO representative summary term (GO rep.), GO term description (GO desc.), as well as gene and protein names are presented in the .xlsx file.

**Table S6.** Differentially regulated genes associated with glycolysis and gluconeogenic pathways, metabolism, mTOR pathway, and hypoxic response in walleye (*Sander vitreus*) sampled from the Red River, Matheson Island, and Dauphin River in 2017 and 2018.

| Gene id                           | Gene          | Contrast                              | D.17vsR.17   |              | D.18vsR.18   |                  | M.17vsR.17   |              | M.18vsR.18   |              | D.17vsM.17 |       | D.18vsM.18   |              |
|-----------------------------------|---------------|---------------------------------------|--------------|--------------|--------------|------------------|--------------|--------------|--------------|--------------|------------|-------|--------------|--------------|
|                                   |               |                                       | logFC        | FDR          | logFC        | FDR              | logFC        | FDR          | logFC        | FDR          | logFC      | FDR   | logFC        | FDR          |
| <i>Glycolysis/gluconeogenesis</i> |               |                                       |              |              |              |                  |              |              |              |              |            |       |              |              |
| walleye_DN102551_c0_g1            | <i>pck1</i>   | R.18 up                               | -0.92        | 0.033        | <b>-1.84</b> | <b>0.000</b>     | -0.17        | 0.816        | <b>-1.03</b> | <b>0.031</b> | -0.75      | 0.223 | -0.81        | 0.082        |
| walleye_DN113477_c6_g3            | <i>aldocb</i> | R.17 down,<br>D.18 up                 | <b>0.51</b>  | <b>0.010</b> | <b>0.67</b>  | <b>0.000</b>     | <b>0.41</b>  | <b>0.048</b> | 0.17         | 0.580        | 0.10       | 0.915 | <b>0.50</b>  | <b>0.019</b> |
| walleye_DN109278_c2_g1            | <i>eno1</i>   | R.17 down,<br>D.18 up                 | <b>0.56</b>  | <b>0.014</b> | <b>0.95</b>  | <b>0.000</b>     | <b>0.54</b>  | <b>0.024</b> | 0.25         | 0.447        | 0.03       | 0.990 | <b>0.70</b>  | <b>0.005</b> |
| walleye_DN113326_c7_g6            | <i>gapdh</i>  | R.17 down,<br>D.18 up                 | <b>0.38</b>  | <b>0.036</b> | <b>0.36</b>  | <b>0.031</b>     | <b>0.46</b>  | <b>0.014</b> | -0.04        | 0.925        | -0.07      | 0.944 | <b>0.40</b>  | <b>0.038</b> |
| walleye_DN113371_c0_g1            | <i>ldha</i>   | R.17 down,<br>D.18 up                 | <b>1.33</b>  | <b>0.001</b> | <b>1.09</b>  | <b>0.002</b>     | <b>1.45</b>  | <b>0.000</b> | 0.20         | 0.778        | -0.12      | 0.963 | <b>0.89</b>  | <b>0.027</b> |
| walleye_DN113371_c4_g1            | <i>ldha</i>   | R.17 down,<br>D.18 up                 | <b>0.93</b>  | <b>0.002</b> | <b>0.98</b>  | <b>0.000</b>     | <b>1.00</b>  | <b>0.001</b> | 0.23         | 0.633        | -0.07      | 0.978 | <b>0.75</b>  | <b>0.018</b> |
| walleye_DN108570_c4_g3            | <i>tpi1b</i>  | R.17 down,<br>D.18 up                 | <b>0.49</b>  | <b>0.015</b> | <b>0.66</b>  | <b>0.000</b>     | <b>0.44</b>  | <b>0.037</b> | 0.18         | 0.551        | 0.05       | 0.974 | <b>0.48</b>  | <b>0.026</b> |
| walleye_DN111971_c3_g8            | <i>eno3</i>   | D.18 up                               | 0.53         | 0.040        | <b>0.86</b>  | <b>0.000</b>     | 0.49         | 0.072        | 0.19         | 0.663        | 0.05       | 0.986 | <b>0.67</b>  | <b>0.013</b> |
| walleye_DN105332_c1_g6            | <i>fbp1</i>   | D.18 up                               | 0.34         | 0.224        | <b>0.57</b>  | <b>0.013</b>     | 0.41         | 0.132        | 0.00         | 0.996        | -0.08      | 0.966 | <b>0.58</b>  | <b>0.033</b> |
| walleye_DN111191_c5_g1            | <i>hk2</i>    | D.18 up                               | 0.33         | 0.040        | <b>0.36</b>  | <b>0.014</b>     | 0.29         | 0.086        | 0.01         | 0.986        | 0.04       | 0.975 | <b>0.35</b>  | <b>0.041</b> |
| walleye_DN104637_c6_g1            | <i>pfkfb1</i> | D.18 up                               | 0.21         | 0.561        | <b>0.85</b>  | <b>0.001</b>     | 0.14         | 0.767        | 0.13         | 0.809        | 0.08       | 0.971 | <b>0.72</b>  | <b>0.018</b> |
| walleye_DN109466_c13_g1           | <i>pkm</i>    | D.18 up                               | 0.30         | 0.156        | <b>0.49</b>  | <b>0.006</b>     | 0.55         | 0.007        | -0.12        | 0.733        | -0.25      | 0.492 | <b>0.62</b>  | <b>0.004</b> |
| <i>Metabolism</i>                 |               |                                       |              |              |              |                  |              |              |              |              |            |       |              |              |
| walleye_DN104552_c6_g1            | <i>mt-nd4</i> | R.both up,<br>M.18 int.,<br>D.18 down | <b>-0.43</b> | <b>0.011</b> | <b>-0.85</b> | <b>&lt;0.001</b> | <b>-0.45</b> | <b>0.011</b> | <b>-0.40</b> | <b>0.037</b> | 0.02       | 0.992 | <b>-0.45</b> | <b>0.012</b> |
| walleye_DN109940_c8_g1            | <i>mt-nd5</i> | R.both up,<br>M.18 int.,<br>D.18 down | <b>-0.66</b> | <b>0.000</b> | <b>-1.17</b> | <b>&lt;0.001</b> | <b>-0.48</b> | <b>0.009</b> | <b>-0.72</b> | <b>0.000</b> | -0.19      | 0.623 | <b>-0.45</b> | <b>0.016</b> |
| walleye_DN109940_c8_g3            | <i>mt-nd5</i> | R.both up,<br>M.18 int.,<br>D.18 down | <b>-0.56</b> | <b>0.002</b> | <b>-1.00</b> | <b>&lt;0.001</b> | <b>-0.41</b> | <b>0.027</b> | <b>-0.54</b> | <b>0.008</b> | -0.15      | 0.769 | <b>-0.47</b> | <b>0.016</b> |
| walleye_DN109940_c8_g7            | <i>mt-nd5</i> | R.both up,<br>M.18 int.,<br>D.18 down | <b>-0.68</b> | <b>0.000</b> | <b>-1.13</b> | <b>&lt;0.001</b> | <b>-0.50</b> | <b>0.004</b> | <b>-0.63</b> | <b>0.001</b> | -0.19      | 0.584 | <b>-0.50</b> | <b>0.005</b> |
| walleye_DN109940_c7_g12           | <i>mt-nd6</i> | R.both up,<br>M.18 int.,<br>D.18 down | <b>-0.65</b> | <b>0.000</b> | <b>-1.10</b> | <b>&lt;0.001</b> | <b>-0.48</b> | <b>0.009</b> | <b>-0.60</b> | <b>0.003</b> | -0.17      | 0.690 | <b>-0.50</b> | <b>0.009</b> |
| walleye_DN104552_c6_g4            | <i>mt-nd3</i> | R.both up                             | <b>-0.44</b> | <b>0.008</b> | <b>-0.92</b> | <b>&lt;0.001</b> | <b>-0.36</b> | <b>0.037</b> | <b>-0.59</b> | <b>0.002</b> | -0.08      | 0.922 | <b>-0.33</b> | <b>0.066</b> |
| walleye_DN108955_c4_g10           | <i>mt-cyb</i> | R.18 up,                              | <b>-0.31</b> | <b>0.098</b> | <b>-0.81</b> | <b>&lt;0.001</b> | <b>-0.36</b> | <b>0.052</b> | <b>-0.40</b> | <b>0.047</b> | 0.06       | 0.963 | <b>-0.41</b> | <b>0.030</b> |

|                         |                |                            |              |              |              |                  |              |              |              |              |       |       |              |              |
|-------------------------|----------------|----------------------------|--------------|--------------|--------------|------------------|--------------|--------------|--------------|--------------|-------|-------|--------------|--------------|
|                         |                | M.18 int. up,<br>D.18 down |              |              |              |                  |              |              |              |              |       |       |              |              |
| walleye_DN112225_c12_g2 | <i>mt-atp8</i> | R.18 up                    | -0.18        | 0.237        | <b>-0.46</b> | <b>&lt;0.001</b> | -0.26        | 0.082        | <b>-0.35</b> | <b>0.028</b> | 0.08  | 0.905 | -0.11        | 0.557        |
| walleye_DN108955_c4_g9  | <i>mt-cyb</i>  | R.18 up                    | -0.27        | 0.171        | <b>-0.77</b> | <b>&lt;0.001</b> | -0.35        | 0.071        | <b>-0.43</b> | <b>0.036</b> | 0.08  | 0.936 | -0.34        | 0.094        |
| walleye_DN107218_c0_g1  | <i>mt-col</i>  | R.17 up,<br>D.18 down      | <b>-0.49</b> | <b>0.002</b> | <b>-0.68</b> | <b>&lt;0.001</b> | <b>-0.54</b> | <b>0.001</b> | -0.31        | 0.090        | 0.05  | 0.960 | <b>-0.36</b> | <b>0.036</b> |
| walleye_DN107218_c2_g1  | <i>mt-col</i>  | R.17 up,<br>D.18 down      | <b>-0.42</b> | <b>0.011</b> | <b>-0.64</b> | <b>&lt;0.001</b> | <b>-0.51</b> | <b>0.003</b> | -0.28        | 0.149        | 0.10  | 0.881 | <b>-0.36</b> | <b>0.042</b> |
| walleye_DN107248_c63_g4 | <i>mt-nd1</i>  | R.17 up,<br>D.18 down      | <b>-0.67</b> | <b>0.001</b> | <b>-1.09</b> | <b>&lt;0.001</b> | <b>-0.49</b> | <b>0.019</b> | -0.37        | 0.116        | -0.18 | 0.720 | <b>-0.72</b> | <b>0.002</b> |
| walleye_DN106456_c2_g1  | <i>mt-col</i>  | R.17 up                    | <b>-0.43</b> | <b>0.004</b> | -0.61        | <0.001           | <b>-0.54</b> | <b>0.001</b> | -0.30        | 0.079        | 0.11  | 0.808 | -0.31        | 0.055        |
| walleye_DN110148_c1_g1  | <i>mt-col</i>  | R.17 up                    | <b>-0.60</b> | <b>0.002</b> | -0.65        | <0.001           | <b>-0.63</b> | <b>0.002</b> | -0.31        | 0.182        | 0.03  | 0.986 | -0.34        | 0.109        |
| walleye_DN100513_c0_g1  | <i>mterf3</i>  | D.18 up                    | 0.25         | 0.070        | <b>0.28</b>  | <b>0.021</b>     | 0.38         | 0.005        | -0.11        | 0.577        | -0.14 | 0.636 | <b>0.40</b>  | <b>0.005</b> |
| walleye_DN102460_c0_g1  | <i>atp5h</i>   | D.18 down                  | 0.12         | 0.649        | <b>-0.62</b> | <b>0.001</b>     | 0.07         | 0.842        | -0.20        | 0.473        | 0.05  | 0.971 | <b>-0.42</b> | <b>0.040</b> |
| walleye_DN112225_c12_g1 | <i>mt-atp6</i> | D.18 down                  | -0.43        | 0.013        | <b>-0.84</b> | <b>&lt;0.001</b> | -0.29        | 0.127        | -0.30        | 0.145        | -0.14 | 0.761 | <b>-0.54</b> | <b>0.004</b> |
| walleye_DN107218_c1_g1  | <i>mt-col</i>  | D.18 down                  | -0.43        | 0.059        | <b>-0.61</b> | <b>0.003</b>     | -0.47        | 0.041        | -0.12        | 0.771        | 0.04  | 0.984 | <b>-0.49</b> | <b>0.041</b> |
| walleye_DN107248_c63_g5 | <i>mt-co2</i>  | D.18 down                  | -0.27        | 0.225        | <b>-0.82</b> | <b>&lt;0.001</b> | -0.17        | 0.518        | -0.27        | 0.288        | -0.09 | 0.926 | <b>-0.55</b> | <b>0.010</b> |
| walleye_DN112462_c1_g1  | <i>mt-co3</i>  | D.18 down                  | -0.52        | 0.029        | <b>-0.84</b> | <b>&lt;0.001</b> | -0.33        | 0.213        | -0.31        | 0.327        | -0.19 | 0.780 | <b>-0.53</b> | <b>0.039</b> |
| walleye_DN112462_c1_g3  | <i>mt-co3</i>  | D.18 down                  | -0.36        | 0.069        | <b>-0.86</b> | <b>&lt;0.001</b> | -0.24        | 0.274        | -0.31        | 0.187        | -0.11 | 0.880 | <b>-0.56</b> | <b>0.006</b> |
| walleye_DN108955_c3_g4  | <i>mt-cyb</i>  | D.18 down                  | -0.27        | 0.202        | <b>-0.84</b> | <b>&lt;0.001</b> | -0.36        | 0.076        | -0.41        | 0.061        | 0.09  | 0.921 | <b>-0.43</b> | <b>0.038</b> |
| walleye_DN104552_c7_g6  | <i>mt-nd4</i>  | D.18 down                  | -0.45        | 0.008        | <b>-0.86</b> | <b>&lt;0.001</b> | -0.42        | 0.017        | -0.36        | 0.063        | -0.03 | 0.984 | <b>-0.50</b> | <b>0.006</b> |
| <i>Hypoxia</i>          |                |                            |              |              |              |                  |              |              |              |              |       |       |              |              |
| walleye_DN110302_c3_g6  | <i>nos1</i>    | R.18 down                  | 3.69         | 0.021        | <b>4.90</b>  | <b>0.001</b>     | 3.25         | 0.051        | <b>3.88</b>  | <b>0.022</b> | 0.44  | 0.960 | 1.02         | 0.552        |
| walleye_DN110766_c1_g5  | <i>egln3</i>   | R.17 down                  | <b>1.12</b>  | <b>0.047</b> | 0.26         | 0.707            | <b>1.19</b>  | <b>0.038</b> | -0.11        | 0.939        | -0.07 | 0.988 | 0.36         | 0.641        |
| walleye_DN113735_c3_g1  | <i>slc2a1</i>  | R.17 down                  | <b>0.45</b>  | <b>0.002</b> | 0.41         | 0.002            | <b>0.48</b>  | <b>0.002</b> | 0.28         | 0.096        | -0.03 | 0.984 | 0.13         | 0.477        |
| walleye_DN113735_c3_g8  | <i>slc2a1</i>  | R.17 down                  | <b>0.94</b>  | <b>0.005</b> | 0.72         | 0.021            | <b>0.76</b>  | <b>0.029</b> | 0.18         | 0.784        | 0.17  | 0.913 | 0.54         | 0.144        |
| walleye_DN100261_c0_g1  | <i>hmox</i>    | D.18 up                    | 0.24         | 0.614        | <b>0.74</b>  | <b>0.027</b>     | 0.16         | 0.784        | -0.45        | 0.351        | 0.08  | 0.980 | <b>1.19</b>  | <b>0.003</b> |
| walleye_DN109309_c3_g1  | <i>hyou1</i>   | D.18 up                    | 0.48         | 0.063        | <b>0.61</b>  | <b>0.007</b>     | 0.90         | 0.001        | -0.01        | 0.988        | -0.42 | 0.247 | <b>0.63</b>  | <b>0.018</b> |
| walleye_DN113024_c7_g1  | <i>hbad</i>    | D.18 down                  | -1.09        | 0.006        | <b>-1.45</b> | <b>0.000</b>     | -0.43        | 0.378        | -0.09        | 0.930        | -0.66 | 0.263 | <b>-1.36</b> | <b>0.002</b> |
| <i>mTOR pathway</i>     |                |                            |              |              |              |                  |              |              |              |              |       |       |              |              |
| walleye_DN105880_c11_g2 | <i>prkaa2</i>  | R.18 up                    | -0.34        | 0.334        | <b>-1.27</b> | <b>0.000</b>     | 0.13         | 0.791        | <b>-0.73</b> | <b>0.034</b> | -0.48 | 0.316 | -0.54        | 0.113        |
| walleye_DN105603_c3_g10 | <i>seh1l</i>   | R.18 down                  | 0.39         | 0.002        | <b>0.56</b>  | <b>0.000</b>     | 0.24         | 0.073        | <b>0.31</b>  | <b>0.029</b> | 0.15  | 0.503 | 0.25         | 0.061        |
| walleye_DN107366_c3_g3  | <i>EIF4A1</i>  | R.17 down,<br>D.18 up      | <b>0.51</b>  | <b>0.001</b> | <b>0.65</b>  | <b>0.000</b>     | <b>0.40</b>  | <b>0.010</b> | 0.30         | 0.079        | 0.11  | 0.813 | <b>0.35</b>  | <b>0.030</b> |
| walleye_DN111020_c1_g2  | <i>EIF4B</i>   | R.17 down,<br>D.18 up      | <b>0.31</b>  | <b>0.023</b> | <b>0.42</b>  | <b>0.001</b>     | <b>0.38</b>  | <b>0.008</b> | 0.10         | 0.656        | -0.06 | 0.932 | <b>0.32</b>  | <b>0.029</b> |
| walleye_DN104291_c1_g1  | <i>EIF4G1</i>  | R.17 down,<br>D.18 up      | <b>0.77</b>  | <b>0.003</b> | <b>0.91</b>  | <b>0.000</b>     | <b>0.77</b>  | <b>0.005</b> | 0.21         | 0.624        | 0.00  | 0.999 | <b>0.70</b>  | <b>0.012</b> |
| walleye_DN113534_c6_g1  | <i>hras</i>    | R.17 down,<br>D.18 up      | <b>0.46</b>  | <b>0.002</b> | <b>0.53</b>  | <b>0.000</b>     | <b>0.35</b>  | <b>0.022</b> | 0.14         | 0.543        | 0.11  | 0.822 | <b>0.39</b>  | <b>0.012</b> |
| walleye_DN111314_c0_g4  | <i>atf4</i>    | R.17 down                  | <b>0.20</b>  | <b>0.037</b> | 0.22         | 0.015            | <b>0.33</b>  | <b>0.001</b> | 0.15         | 0.196        | -0.13 | 0.444 | 0.06         | 0.643        |
| walleye_DN106983_c0_g1  | <i>EIF4E</i>   | R.17 down                  | <b>0.42</b>  | <b>0.001</b> | 0.14         | 0.275            | <b>0.35</b>  | <b>0.006</b> | -0.14        | 0.378        | 0.07  | 0.870 | 0.28         | 0.031        |
| walleye_DN106499_c5_g4  | <i>grb2</i>    | R.17 down                  | <b>0.47</b>  | <b>0.000</b> | 0.09         | 0.377            | <b>0.32</b>  | <b>0.002</b> | 0.10         | 0.460        | 0.14  | 0.368 | -0.01        | 0.961        |

|                              |                |                       |             |              |              |              |             |              |       |       |       |       |              |              |
|------------------------------|----------------|-----------------------|-------------|--------------|--------------|--------------|-------------|--------------|-------|-------|-------|-------|--------------|--------------|
| walleye_DN113534_c6_g4       | <i>hras</i>    | R.17 down             | <b>0.28</b> | <b>0.006</b> | 0.19         | 0.043        | <b>0.44</b> | <b>0.000</b> | 0.11  | 0.432 | -0.16 | 0.283 | 0.08         | 0.568        |
| walleye_DN108382_c6_g1       | <i>kras</i>    | R.17 down             | <b>0.43</b> | <b>0.000</b> | 0.25         | 0.020        | <b>0.50</b> | <b>0.000</b> | 0.09  | 0.656 | -0.07 | 0.883 | 0.17         | 0.210        |
| walleye_DN109684_c2_g3       | <i>lamtor2</i> | R.17 down             | <b>0.31</b> | <b>0.006</b> | 0.24         | 0.020        | <b>0.25</b> | <b>0.030</b> | 0.14  | 0.364 | 0.06  | 0.912 | 0.10         | 0.468        |
| walleye_DN105554_c3_g7       | <i>mapk1</i>   | R.17 down             | <b>0.33</b> | <b>0.015</b> | 0.31         | 0.013        | <b>0.29</b> | <b>0.039</b> | 0.09  | 0.731 | 0.04  | 0.969 | 0.23         | 0.131        |
| walleye_DN113739_c6_g6       | <i>mapk1</i>   | R.17 down             | <b>0.51</b> | <b>0.002</b> | 0.17         | 0.319        | <b>0.37</b> | <b>0.030</b> | -0.03 | 0.954 | 0.14  | 0.764 | 0.20         | 0.306        |
| walleye_DN103901_c0_g1       | <i>mtor</i>    | R.17 down             | <b>0.33</b> | <b>0.012</b> | 0.30         | 0.011        | <b>0.32</b> | <b>0.018</b> | 0.18  | 0.290 | 0.01  | 0.994 | 0.13         | 0.435        |
| walleye_DN105466_c8_g1       | <i>pdpk1</i>   | R.17 down             | <b>0.28</b> | <b>0.006</b> | 0.02         | 0.884        | <b>0.36</b> | <b>0.001</b> | 0.09  | 0.593 | -0.07 | 0.824 | -0.06        | 0.672        |
| walleye_DN109353_c2_g8       | <i>rragc</i>   | R.17 down             | <b>0.23</b> | <b>0.017</b> | 0.21         | 0.023        | <b>0.26</b> | <b>0.010</b> | 0.15  | 0.234 | -0.03 | 0.967 | 0.06         | 0.674        |
| walleye_DN109353_c2_g5       | <i>rragc</i>   | D.18 up               | 0.55        | 0.001        | <b>0.56</b>  | <b>0.000</b> | 0.14        | 0.526        | 0.10  | 0.757 | 0.40  | 0.060 | <b>0.46</b>  | <b>0.009</b> |
| walleye_DN112490_c3_g1       | <i>nprl3</i>   | D.18 down             | -0.18       | 0.463        | <b>-0.39</b> | <b>0.037</b> | -0.23       | 0.335        | 0.18  | 0.556 | 0.05  | 0.974 | <b>-0.58</b> | <b>0.008</b> |
| <i>PI3K/AKT/mTOR pathway</i> |                |                       |             |              |              |              |             |              |       |       |       |       |              |              |
| walleye_DN112562_c7_g4       | <i>foxo1a</i>  | R.17 down             | <b>0.54</b> | <b>0.016</b> | 0.29         | 0.205        | <b>0.66</b> | <b>0.005</b> | 0.29  | 0.331 | -0.11 | 0.917 | 0.00         | 0.995        |
| walleye_DN103115_c0_g1       | <i>acaca</i>   | R.17 down,<br>D.18 up | <b>0.68</b> | <b>0.003</b> | <b>1.10</b>  | <b>0.000</b> | <b>0.69</b> | <b>0.004</b> | 0.37  | 0.181 | -0.01 | 0.999 | <b>0.73</b>  | <b>0.004</b> |
| walleye_DN108540_c0_g1       | <i>acly</i>    | R.17 down,<br>D.18 up | <b>0.65</b> | <b>0.000</b> | <b>0.83</b>  | <b>0.000</b> | <b>0.68</b> | <b>0.000</b> | 0.31  | 0.100 | -0.03 | 0.984 | <b>0.52</b>  | <b>0.003</b> |
| walleye_DN108540_c0_g2       | <i>acly</i>    | R.17 down,<br>D.18 up | <b>0.62</b> | <b>0.000</b> | <b>0.81</b>  | <b>0.000</b> | <b>0.77</b> | <b>0.000</b> | 0.27  | 0.212 | -0.16 | 0.717 | <b>0.54</b>  | <b>0.004</b> |
| <i>Citric acid cycle</i>     |                |                       |             |              |              |              |             |              |       |       |       |       |              |              |
| walleye_DN107782_c2_g6       | <i>idh1</i>    | R.17 down             | <b>1.11</b> | <b>0.001</b> | 0.45         | 0.154        | <b>0.94</b> | <b>0.006</b> | 0.04  | 0.971 | 0.17  | 0.912 | 0.42         | 0.263        |
| walleye_DN107754_c3_g2       | <i>ogdh</i>    | R.17 down             | <b>0.35</b> | <b>0.012</b> | 0.15         | 0.298        | <b>0.37</b> | <b>0.011</b> | 0.06  | 0.825 | -0.02 | 0.988 | 0.09         | 0.668        |
| walleye_DN107308_c5_g1       | <i>sdha</i>    | R.17 down             | <b>0.35</b> | <b>0.008</b> | -0.06        | 0.742        | <b>0.30</b> | <b>0.029</b> | -0.06 | 0.814 | 0.05  | 0.948 | 0.01         | 0.985        |

R.17, Red River 2017; R.18, Red River 2018; R.both, Red River both years; D.17, Dauphin River 2017; D.18, Dauphin River 2018; M.17, Matheson Island 2017; logFC, Log<sub>2</sub> fold-change; FDR, false discovery rate.

Significant differentially regulated genes are represented as bolded text. logFC values for significantly regulated genes are coloured to reflect genes differentially regulated in Red River (teal) and Dauphin River (blue) fish. In some cases, multiple contrasts may have been significant.

**Table S7.** Differentially regulated genes associated with ion regulation in walleye (*Sander vitreus*) sampled from the Red River, Matheson Island, and Dauphin River in 2017 and 2018.

| Gene id                 | Gene             | Contrast              | D.17vsR.17   |              | D.18vsR.18   |              | M.17vsR.17   |              | M.18vsR.18   |              | D.17vsM.17   |              | D.18vsM.18   |              |
|-------------------------|------------------|-----------------------|--------------|--------------|--------------|--------------|--------------|--------------|--------------|--------------|--------------|--------------|--------------|--------------|
|                         |                  |                       | logFC        | FDR          |
| walleye_DN108377_c4_g1  | <i>aqp3</i>      | M.17 up               | 0.04         | 0.987        | 1.56         | 0.288        | <b>3.62</b>  | <b>0.009</b> | 1.32         | 0.540        | <b>-3.58</b> | <b>0.035</b> | 0.24         | 0.927        |
| walleye_DN111678_c3_g2  | <i>aqp8</i>      | D.18 down             | -1.48        | 0.098        | <b>-2.90</b> | <b>0.001</b> | -0.57        | 0.641        | -0.75        | 0.570        | -0.92        | 0.618        | <b>-2.15</b> | <b>0.031</b> |
| walleye_DN102608_c0_g1  | <i>aqpa</i>      | D.18 down             | -1.14        | 0.013        | <b>-1.99</b> | <b>0.000</b> | -0.59        | 0.263        | -0.73        | 0.188        | -0.55        | 0.535        | <b>-1.26</b> | <b>0.010</b> |
| walleye_DN113771_c9_g2  | <i>atp1a1</i>    | R.18 up               | -0.08        | 0.856        | <b>-1.16</b> | <b>0.000</b> | 0.17         | 0.692        | <b>-0.76</b> | <b>0.016</b> | -0.25        | 0.725        | -0.40        | 0.198        |
| walleye_DN104577_c1_g1  | <i>atp1a1</i>    | R.17 up               | <b>-0.59</b> | <b>0.009</b> | -0.84        | 0.000        | <b>-0.52</b> | <b>0.027</b> | -0.44        | 0.094        | -0.07        | 0.963        | -0.41        | 0.101        |
| walleye_DN104577_c1_g2  | <i>atp1a1</i>    | D.18 down             | -0.22        | 0.651        | <b>-1.66</b> | <b>0.000</b> | 0.11         | 0.866        | -0.47        | 0.310        | -0.33        | 0.705        | <b>-1.19</b> | <b>0.002</b> |
| walleye_DN113771_c14_g1 | <i>atp1a1</i>    | D.18 down             | -0.11        | 0.843        | <b>-1.50</b> | <b>0.000</b> | 0.18         | 0.748        | -0.49        | 0.292        | -0.30        | 0.760        | <b>-1.01</b> | <b>0.008</b> |
| walleye_DN113771_c14_g3 | <i>atp1a1</i>    | D.18 down             | -0.09        | 0.890        | <b>-1.52</b> | <b>0.000</b> | 0.17         | 0.778        | -0.43        | 0.394        | -0.26        | 0.832        | <b>-1.09</b> | <b>0.007</b> |
| walleye_DN106483_c6_g4  | <i>atp1a3</i>    | R.17 down             | <b>0.80</b>  | <b>0.002</b> | 0.69         | 0.004        | <b>0.58</b>  | <b>0.031</b> | 0.21         | 0.617        | 0.22         | 0.754        | 0.48         | 0.089        |
| walleye_DN113771_c11_g1 | <i>atp1a3</i>    | D.18 up               | 0.23         | 0.140        | <b>0.54</b>  | <b>0.000</b> | 0.23         | 0.141        | 0.08         | 0.787        | -0.01        | 0.997        | <b>0.47</b>  | <b>0.003</b> |
| walleye_DN113771_c11_g5 | <i>atp1a3</i>    | D.18 up               | 0.26         | 0.292        | <b>0.77</b>  | <b>0.000</b> | 0.36         | 0.133        | 0.23         | 0.459        | -0.10        | 0.937        | <b>0.54</b>  | <b>0.022</b> |
| walleye_DN113859_c9_g1  | <i>atp1a3</i>    | D.18 up               | 0.20         | 0.190        | <b>0.41</b>  | <b>0.002</b> | 0.24         | 0.109        | -0.02        | 0.960        | -0.04        | 0.965        | <b>0.43</b>  | <b>0.005</b> |
| walleye_DN113488_c5_g3  | <i>atp2a2</i>    | D.both down           | <b>-0.42</b> | <b>0.016</b> | <b>-0.39</b> | <b>0.017</b> | 0.03         | 0.921        | 0.00         | 0.996        | <b>-0.45</b> | <b>0.041</b> | <b>-0.39</b> | <b>0.039</b> |
| walleye_DN106163_c0_g1  | <i>atp2b4</i>    | R.17 down             | <b>0.72</b>  | <b>0.000</b> | 0.52         | 0.001        | <b>0.58</b>  | <b>0.001</b> | 0.23         | 0.286        | 0.14         | 0.748        | 0.30         | 0.102        |
| walleye_DN103456_c0_g1  | <i>atp2b4</i>    | M.18 up               | 2.63         | 0.267        | -4.18        | 0.144        | 1.35         | 0.669        | <b>5.29</b>  | <b>0.030</b> | 1.29         | 0.849        | <b>-9.47</b> | <b>0.003</b> |
| walleye_DN111653_c1_g1  | <i>atp6v0a2</i>  | R.17 down             | <b>0.25</b>  | <b>0.044</b> | 0.19         | 0.110        | <b>0.37</b>  | <b>0.004</b> | -0.03        | 0.933        | -0.12        | 0.681        | 0.22         | 0.110        |
| walleye_DN107940_c2_g1  | <i>atp6v0e1</i>  | R.17 down             | <b>0.33</b>  | <b>0.002</b> | 0.10         | 0.386        | <b>0.23</b>  | <b>0.035</b> | 0.01         | 0.970        | 0.10         | 0.704        | 0.09         | 0.542        |
| walleye_DN106269_c5_g1  | <i>atp6v1a</i>   | R.17 down,<br>D.18 up | <b>1.22</b>  | <b>0.000</b> | <b>1.24</b>  | <b>0.000</b> | <b>0.87</b>  | <b>0.002</b> | 0.43         | 0.184        | 0.36         | 0.436        | <b>0.82</b>  | <b>0.005</b> |
| walleye_DN102031_c0_g1  | <i>atp6v1b2</i>  | R.17 down,<br>D.18 up | <b>0.43</b>  | <b>0.002</b> | <b>0.49</b>  | <b>0.000</b> | <b>0.34</b>  | <b>0.020</b> | 0.13         | 0.514        | 0.10         | 0.827        | <b>0.36</b>  | <b>0.016</b> |
| walleye_DN108788_c7_g1  | <i>atp6v1c1a</i> | R.17 down,<br>D.18 up | <b>0.47</b>  | <b>0.001</b> | <b>0.51</b>  | <b>0.000</b> | <b>0.39</b>  | <b>0.005</b> | 0.08         | 0.766        | 0.07         | 0.897        | <b>0.43</b>  | <b>0.004</b> |
| walleye_DN104855_c4_g3  | <i>atp6v1c1a</i> | D.18 up               | 0.49         | 0.014        | <b>0.56</b>  | <b>0.003</b> | 0.19         | 0.465        | 0.07         | 0.873        | 0.30         | 0.349        | <b>0.49</b>  | <b>0.024</b> |
| walleye_DN110109_c4_g3  | <i>atp6v1e1</i>  | R.17 down,<br>D.18 up | <b>0.68</b>  | <b>0.000</b> | <b>0.76</b>  | <b>0.000</b> | <b>0.48</b>  | <b>0.017</b> | 0.16         | 0.588        | 0.21         | 0.618        | <b>0.60</b>  | <b>0.004</b> |
| walleye_DN106672_c2_g2  | <i>atp6v1h</i>   | D.17 down             | <b>-6.37</b> | <b>0.008</b> | 0.51         | 0.846        | 0.10         | 0.980        | 0.40         | 0.932        | <b>-6.46</b> | <b>0.035</b> | 0.10         | 0.982        |
| walleye_DN104183_c4_g7  | <i>camk1</i>     | R.both down           | <b>0.56</b>  | <b>0.000</b> | <b>0.65</b>  | <b>0.000</b> | <b>0.64</b>  | <b>0.000</b> | <b>0.58</b>  | <b>0.001</b> | -0.08        | 0.920        | 0.07         | 0.781        |
| walleye_DN106317_c1_g1  | <i>camk1d</i>    | D.18 up               | 1.39         | 0.011        | <b>2.38</b>  | <b>0.000</b> | 0.64         | 0.328        | 0.60         | 0.439        | 0.75         | 0.414        | <b>1.79</b>  | <b>0.003</b> |
| walleye_DN105627_c1_g1  | <i>camk2g</i>    | R.17 down             | <b>0.38</b>  | <b>0.004</b> | 0.18         | 0.172        | <b>0.31</b>  | <b>0.020</b> | 0.05         | 0.865        | 0.06         | 0.923        | 0.13         | 0.435        |
| walleye_DN104069_c3_g1  | <i>cdc42</i>     | R.both down           | <b>0.41</b>  | <b>0.000</b> | <b>0.34</b>  | <b>0.000</b> | <b>0.43</b>  | <b>0.000</b> | <b>0.33</b>  | <b>0.005</b> | -0.02        | 0.987        | 0.01         | 0.959        |
| walleye_DN104069_c3_g2  | <i>cdc42</i>     | R.both down           | <b>0.40</b>  | <b>0.002</b> | <b>0.25</b>  | <b>0.034</b> | <b>0.55</b>  | <b>0.000</b> | <b>0.29</b>  | <b>0.043</b> | -0.15        | 0.550        | -0.04        | 0.861        |
| walleye_DN107058_c0_g1  | <i>clcn5</i>     | R.17 down             | <b>0.50</b>  | <b>0.015</b> | 0.17         | 0.436        | <b>0.51</b>  | <b>0.015</b> | 0.07         | 0.876        | -0.02        | 0.994        | 0.10         | 0.750        |
| walleye_DN111682_c2_g1  | <i>cldn1</i>     | D.18 down             | 0.03         | 0.947        | <b>-0.49</b> | <b>0.041</b> | 0.52         | 0.054        | 0.26         | 0.476        | -0.48        | 0.175        | <b>-0.75</b> | <b>0.006</b> |
| walleye_DN111682_c2_g6  | <i>cldn1</i>     | D.18 down             | 0.30         | 0.432        | <b>-0.60</b> | <b>0.039</b> | 0.79         | 0.014        | 0.16         | 0.785        | -0.49        | 0.301        | <b>-0.76</b> | <b>0.023</b> |
| walleye_DN110492_c2_g9  | <i>cldn22</i>    | R.both up             | <b>-1.14</b> | <b>0.013</b> | <b>-0.96</b> | <b>0.023</b> | <b>-1.43</b> | <b>0.003</b> | <b>-1.11</b> | <b>0.032</b> | 0.28         | 0.869        | 0.15         | 0.855        |
| walleye_DN100552_c0_g1  | <i>cldn3</i>     | R.17 down             | <b>4.05</b>  | <b>0.046</b> | 1.05         | 0.633        | <b>4.38</b>  | <b>0.037</b> | 4.64         | 0.044        | -0.33        | 0.984        | -3.58        | 0.091        |
| walleye_DN106664_c5_g3  | <i>cldn4</i>     | D.18 down             | -0.06        | 0.901        | <b>-0.63</b> | <b>0.017</b> | 0.39         | 0.221        | 0.09         | 0.894        | -0.45        | 0.298        | <b>-0.72</b> | <b>0.019</b> |

|                        |                |                                    |              |              |              |              |              |              |              |              |       |       |              |              |
|------------------------|----------------|------------------------------------|--------------|--------------|--------------|--------------|--------------|--------------|--------------|--------------|-------|-------|--------------|--------------|
| walleye_DN83550_c0_g1  | <i>cldn5</i>   | R.both up                          | <b>-0.69</b> | <b>0.010</b> | <b>-1.07</b> | <b>0.000</b> | <b>-1.13</b> | <b>0.000</b> | <b>-1.05</b> | <b>0.001</b> | 0.44  | 0.285 | -0.02        | 0.977        |
| walleye_DN110590_c3_g1 | <i>cldn8</i>   | D.18 down                          | -0.51        | 0.174        | <b>-1.46</b> | <b>0.000</b> | 0.05         | 0.939        | -0.62        | 0.132        | -0.56 | 0.291 | <b>-0.85</b> | <b>0.023</b> |
| walleye_DN103849_c4_g3 | <i>kcjnl</i>   | R.18 up                            | -0.64        | 0.188        | <b>-1.23</b> | <b>0.003</b> | -0.31        | 0.623        | <b>-1.15</b> | <b>0.023</b> | -0.33 | 0.815 | -0.08        | 0.934        |
| walleye_DN104249_c1_g4 | <i>kcjnl16</i> | D.18 down                          | 0.00         | 0.997        | <b>-1.06</b> | <b>0.002</b> | 0.26         | 0.616        | -0.04        | 0.967        | -0.26 | 0.827 | <b>-1.02</b> | <b>0.009</b> |
| walleye_DN111684_c8_g2 | <i>nr3c2</i>   | R.17 down                          | <b>0.65</b>  | <b>0.011</b> | 0.74         | 0.002        | <b>0.67</b>  | <b>0.011</b> | 0.51         | 0.083        | -0.02 | 0.994 | 0.23         | 0.475        |
| walleye_DN104639_c0_g1 | <i>rhcgl</i>   | R.18 up,<br>M.18 Int,<br>D.18 down | -0.54        | 0.123        | <b>-2.07</b> | <b>0.000</b> | -0.09        | 0.882        | <b>-0.77</b> | <b>0.041</b> | -0.45 | 0.436 | <b>-1.31</b> | <b>0.001</b> |
| walleye_DN112974_c2_g2 | <i>slc12a3</i> | D.18 up                            | 0.35         | 0.688        | <b>1.15</b>  | <b>0.047</b> | -0.49        | 0.563        | -0.45        | 0.674        | 0.84  | 0.437 | <b>1.60</b>  | <b>0.018</b> |
| walleye_DN106771_c6_g3 | <i>slc12a8</i> | D.18 up                            | 0.59         | 0.219        | <b>1.74</b>  | <b>0.000</b> | -0.19        | 0.798        | 0.20         | 0.825        | 0.78  | 0.220 | <b>1.54</b>  | <b>0.002</b> |
| walleye_DN105800_c0_g5 | <i>slc4a1</i>  | R.17 up                            | <b>-1.83</b> | <b>0.012</b> | -1.21        | 0.080        | <b>-1.53</b> | <b>0.043</b> | -0.82        | 0.414        | -0.30 | 0.941 | -0.39        | 0.731        |
| walleye_DN111084_c5_g1 | <i>slc9a1</i>  | R.18 up                            | -0.90        | 0.002        | <b>-1.71</b> | <b>0.000</b> | -0.44        | 0.177        | <b>-1.10</b> | <b>0.001</b> | -0.46 | 0.312 | -0.61        | 0.057        |
| walleye_DN105658_c3_g2 | <i>slc9a3</i>  | R.18 up,<br>M18 Int,<br>D.18 down  | -0.16        | 0.764        | <b>-1.92</b> | <b>0.000</b> | -0.07        | 0.918        | <b>-0.81</b> | <b>0.037</b> | -0.09 | 0.974 | <b>-1.11</b> | <b>0.004</b> |
| walleye_DN108637_c1_g1 | <i>tjp3</i>    | R.17 down                          | <b>0.38</b>  | <b>0.012</b> | 0.42         | 0.003        | <b>0.45</b>  | <b>0.004</b> | 0.28         | 0.119        | -0.07 | 0.929 | 0.14         | 0.485        |

R.17, Red River 2017; R.18, Red River 2018; R.both, Red River both years; D.17, Dauphin River 2017; D.18, Dauphin River 2018; M.17, Matheson Island 2017; logFC, Log<sub>2</sub> fold-change; FDR, false discovery rate

Significant differentially regulated genes are represented as bolded text. logFC values for significantly regulated genes are coloured to reflect genes differentially regulated in Red River (teal), Matheson Island (light blue), and Dauphin River (dark blue) fish. In some cases, multiple contrasts may have been significant.

**Table S8.** Results for linear models examining the consistency of candidate gene mRNA levels measured by qPCR of walleye sampled in the Lake Winnipeg system (Red River, Matheson Island, Dauphin River) in 2017 and 2018 that were or were not part of the RNA-seq study.

| <b>Gene</b>    | <b>Factor<sup>a</sup></b> | <b>Sum squares</b> | <b>df</b> | <b>F-value</b> | <b>p-value</b>    |
|----------------|---------------------------|--------------------|-----------|----------------|-------------------|
| <i>actn4</i>   | Year                      | 6136.00            | 1         | 8.46           | <b>0.005</b>      |
|                | RNAseq                    | 3954.00            | 1         | 5.45           | <b>0.022</b>      |
|                | Total length              | 78.00              | 1         | 0.11           | 0.744             |
|                | Mass                      | 41.00              | 1         | 0.06           | 0.814             |
| <i>actr2</i>   | Location                  | 3.77               | 2         | 7.06           | <b>0.001</b>      |
|                | Year                      | 1.48               | 1         | 5.57           | <b>0.020</b>      |
|                | Total length              | 0.10               | 1         | 0.37           | 0.546             |
| <i>akr1a1b</i> | Year                      | 6.00               | 1         | 19.46          | <b>&lt; 0.001</b> |
|                | RNAseq                    | 1.12               | 1         | 3.65           | 0.059             |
| <i>ap1s1</i>   | Location                  | 1.20               | 2         | 2.52           | 0.086             |
|                | Year                      | 2.08               | 1         | 8.75           | <b>0.004</b>      |
|                | Total length              | 0.11               | 1         | 0.46           | 0.498             |
|                | Location × Year           | 0.95               | 2         | 2.01           | 0.141             |
| <i>arf6</i>    | Location                  | 3.818              | 2         | 12.06          | <b>&lt; 0.001</b> |
|                | Year                      | 0.07               | 1         | 0.44           | 0.510             |
|                | Total length              | 0.02               | 1         | 0.10           | 0.755             |
|                | Location × Year           | 1.76               | 2         | 5.55           | 0.005             |
| <i>arhgdia</i> | Year                      | 0.79               | 1         | 2.63           | 0.108             |
|                | RNAseq                    | 0.67               | 1         | 2.23           | 0.138             |
|                | Total length              | 0.06               | 1         | 0.21           | 0.652             |
|                | Mass                      | 0.38               | 1         | 1.24           | 0.268             |
| <i>cdc42</i>   | Location                  | 0.60               | 2         | 1.87           | 0.160             |
|                | Year                      | 1.35               | 1         | 8.40           | <b>0.005</b>      |
|                | RNAseq                    | 0.17               | 1         | 1.05           | 0.309             |
| <i>cnnm4</i>   | Location                  | 0.32               | 2         | 0.79           | 0.457             |
|                | Year                      | 3.43               | 1         | 16.73          | <b>&lt; 0.001</b> |
|                | RNAseq                    | 0.50               | 1         | 2.45           | 0.121             |
|                | Total length              | 0.21               | 1         | 1.04           | 0.310             |
|                | Location × Year           | 1.14               | 2         | 2.78           | 0.067             |
| <i>cot1l</i>   | Location                  | 16.90              | 2         | 42.46          | <b>&lt; 0.001</b> |
|                | Year                      | 0.34               | 1         | 1.72           | 0.193             |
|                | Total length              | 0.08               | 1         | 0.38           | 0.538             |
|                | Mass                      | 0.00               | 1         | 0.02           | 0.879             |
| <i>dgka</i>    | Location                  | 1.99               | 2         | 3.56           | <b>0.033</b>      |
|                | Year                      | 8.29               | 1         | 29.61          | <b>&lt; 0.001</b> |
|                | RNAseq                    | 0.87               | 1         | 3.12           | 0.081             |
|                | Total length              | 0.59               | 1         | 2.10           | 0.151             |
| <i>dnajc9</i>  | Location                  | 1.39               | 2         | 3.59           | <b>0.031</b>      |
|                | Year                      | 3.56               | 1         | 18.36          | <b>&lt; 0.001</b> |
|                | RNAseq                    | 0.38               | 1         | 1.93           | 0.168             |

|                   |                 |      |   |       |                |
|-------------------|-----------------|------|---|-------|----------------|
|                   | Total length    | 0.00 | 1 | 0.01  | 0.931          |
| <i>eipr1</i>      | Location        | 0.99 | 2 | 1.98  | 0.144          |
|                   | Year            | 3.38 | 1 | 13.57 | < <b>0.001</b> |
|                   | RNAseq          | 0.70 | 1 | 2.81  | 0.097          |
|                   | Total length    | 0.25 | 1 | 1.02  | 0.316          |
|                   | Location × Year | 0.82 | 2 | 1.65  | 0.197          |
| <i>fam49b</i>     | Location        | 3.67 | 2 | 9.68  | < <b>0.001</b> |
|                   | Year            | 3.95 | 1 | 20.82 | < <b>0.001</b> |
|                   | RNAseq          | 0.23 | 1 | 1.21  | 0.275          |
|                   | Mass            | 0.00 | 1 | 0.02  | 0.887          |
|                   | Location × Year | 0.91 | 2 | 2.40  | 0.097          |
| <i>gpx1</i>       | Location        | 7.21 | 2 | 12.69 | < <b>0.001</b> |
|                   | Year            | 7.59 | 1 | 26.72 | < <b>0.001</b> |
|                   | Mass            | 0.18 | 1 | 0.62  | 0.435          |
|                   | Location × Year | 1.41 | 2 | 2.48  | 0.089          |
| <i>mcu</i>        | Location        | 1.56 | 2 | 2.97  | 0.056          |
|                   | Year            | 4.34 | 1 | 16.54 | < <b>0.001</b> |
|                   | RNAseq          | 1.01 | 1 | 3.84  | 0.053          |
|                   | Total length    | 0.61 | 1 | 2.32  | 0.132          |
|                   | Mass            | 0.34 | 1 | 1.29  | 0.259          |
| <i>pfn2</i>       | Location        | 2.63 | 2 | 5.69  | <b>0.005</b>   |
|                   | Mass            | 0.21 | 1 | 0.92  | 0.339          |
| <i>rpa2</i>       | Location        | 9.96 | 2 | 15.68 | < <b>0.001</b> |
|                   | RNAseq          | 0.05 | 1 | 0.17  | 0.679          |
| <i>slc25a24</i>   | Location        | 0.95 | 2 | 1.41  | 0.248          |
|                   | Year            | 5.40 | 1 | 16.14 | < <b>0.001</b> |
| <i>tnfaip8l2b</i> | Year            | 3.28 | 1 | 16.02 | < <b>0.001</b> |
|                   | RNAseq          | 0.20 | 1 | 0.98  | 0.324          |
| <i>ube2j1</i>     | Location        | 3.78 | 2 | 7.81  | < <b>0.001</b> |
|                   | Year            | 0.29 | 1 | 1.19  | 0.279          |
|                   | Mass            | 0.15 | 1 | 0.60  | 0.440          |
|                   | Location × Year | 4.33 | 2 | 8.94  | < <b>0.001</b> |

<sup>a</sup> Akaike Information Criterion (AIC) was used to determine which fixed factors (location, year, RNAseq vs. non-RNAseq, total length, mass, location × year) were included in the linear model. Significant fixed factors are represented as bolded text. See Table S2 for gene abbreviations.



**Table S9.** Results for the linear models examining the relative mRNA levels measured by qPCR of 20 candidate genes for walleye (*Sander vitreus*) sampled from the Red River, Riverton, Matheson Island, and Dauphin River in 2017 and 2018.

| <b>Gene</b>    | <b>Factor<sup>a</sup></b> | <b>Sum squares</b> | <b>df</b> | <b>F-value</b> | <b>p-value</b> |
|----------------|---------------------------|--------------------|-----------|----------------|----------------|
| <i>actn4</i>   | Location                  | 1.32               | 3         | 1.45           | 0.232          |
|                | Year                      | 5.42               | 1         | 17.87          | < <b>0.001</b> |
| <i>actr2</i>   | Location                  | 23909.00           | 3         | 5.18           | <b>0.002</b>   |
|                | Year                      | 8163.00            | 1         | 5.31           | <b>0.023</b>   |
|                | Mass                      | 320.00             | 1         | 0.21           | 0.649          |
| <i>akr1a1b</i> | Location                  | 1.95               | 3         | 2.31           | 0.079          |
|                | Year                      | 1.57               | 1         | 5.58           | <b>0.020</b>   |
|                | Mass                      | 0.04               | 1         | 0.15           | 0.698          |
|                | Location × Year           | 2.27               | 3         | 2.69           | <b>0.049</b>   |
| <i>ap1s1</i>   | Location                  | 1.35               | 3         | 1.95           | 0.124          |
|                | Year                      | 2.46               | 1         | 10.68          | <b>0.001</b>   |
|                | Total length              | 0.12               | 1         | 0.53           | 0.468          |
| <i>arf6</i>    | Location                  | 3.86               | 3         | 8.37           | < <b>0.001</b> |
|                | Year                      | 0.007              | 1         | 0.47           | 0.496          |
|                | Total length              | 0.02               | 1         | 0.14           | 0.710          |
|                | Location × Year           | 1.93               | 3         | 4.18           | <b>0.007</b>   |
| <i>arhgdia</i> | Year                      | 1.41               | 1         | 4.85           | <b>0.029</b>   |
|                | Mass                      | 0.35               | 1         | 1.21           | 0.273          |
| <i>cdc42</i>   | Location                  | 1.02               | 3         | 1.90           | 0.132          |
|                | Year                      | 1.44               | 1         | 8.06           | <b>0.005</b>   |
|                | Mass                      | 0.04               | 1         | 0.23           | 0.630          |
| <i>cnm4</i>    | Location                  | 2.14               | 3         | 3.53           | <b>0.017</b>   |
|                | Year                      | 0.08               | 1         | 0.38           | 0.537          |
|                | Total length              | 0.30               | 1         | 1.50           | 0.222          |
|                | Location × Year           | 1.87               | 3         | 3.08           | <b>0.030</b>   |
| <i>cot11</i>   | Location                  | 18.78              | 3         | 28.65          | < <b>0.001</b> |
|                | Year                      | 1.24               | 1         | 5.66           | <b>0.019</b>   |
|                | Total length              | 0.12               | 1         | 0.54           | 0.464          |
|                | Mass                      | 0.01               | 1         | 0.02           | 0.875          |
| <i>dgka</i>    | Location                  | 2.15               | 3         | 2.73           | <b>0.046</b>   |
|                | Year                      | 9.10               | 1         | 34.77          | < <b>0.001</b> |
|                | Total length              | 0.06               | 1         | 0.24           | 0.627          |
| <i>dnajc9</i>  | Location                  | 1.98               | 3         | 2.80           | <b>0.042</b>   |
|                | Year                      | 3.79               | 1         | 16.11          | < <b>0.001</b> |
|                | Mass                      | 0.27               | 1         | 1.15           | 0.286          |
| <i>eipr1</i>   | Location                  | 1.66               | 3         | 2.03           | 0.112          |
|                | Year                      | 3.83               | 1         | 14.07          | < <b>0.001</b> |
|                | Mass                      | 0.172              | 1         | 0.63           | 0.427          |
| <i>fam49b</i>  | Location                  | 5.46               | 3         | 9.87           | < <b>0.001</b> |

|                   |                 |       |   |       |                |
|-------------------|-----------------|-------|---|-------|----------------|
|                   | Year            | 4.65  | 1 | 25.24 | < <b>0.001</b> |
|                   | Mass            | 1.05  | 1 | 5.67  | <b>0.018</b>   |
|                   | Location × Year | 0.86  | 3 | 1.55  | 0.205          |
| <i>gpx1</i>       | Location        | 9.23  | 3 | 9.86  | < <b>0.001</b> |
|                   | Year            | 10.28 | 1 | 32.91 | < <b>0.001</b> |
|                   | Location × Year | 1.58  | 3 | 1.69  | 0.173          |
| <i>mcu</i>        | Location        | 1.58  | 3 | 2.05  | 0.110          |
|                   | Year            | 5.22  | 1 | 20.32 | < <b>0.001</b> |
|                   | Total length    | 0.008 | 1 | 0.03  | 0.861          |
| <i>pfn2</i>       | Location        | 2.86  | 3 | 4.25  | <b>0.007</b>   |
|                   | Year            | 0.08  | 1 | 0.37  | 0.542          |
| <i>rpa2</i>       | Location        | 9.12  | 3 | 8.97  | < <b>0.001</b> |
|                   | Total length    | 0.02  | 1 | 0.05  | 0.817          |
| <i>slc25a24</i>   | Location        | 1.91  | 3 | 2.13  | 0.100          |
|                   | Year            | 7.70  | 1 | 25.88 | < <b>0.001</b> |
|                   | Mass            | 0.34  | 1 | 1.13  | 0.290          |
| <i>tnfaip8l2b</i> | Location        | 0.84  | 3 | 1.42  | 0.240          |
|                   | Year            | 2.71  | 1 | 13.77 | < <b>0.001</b> |
|                   | Mass            | 0.32  | 1 | 1.60  | 0.207          |
| <i>ube2j1</i>     | Location        | 3.88  | 3 | 5.73  | <b>0.001</b>   |
|                   | Year            | 0.30  | 1 | 1.32  | 0.253          |
|                   | Mass            | 0.33  | 1 | 1.47  | 0.227          |
|                   | Location × Year | 4.57  | 3 | 6.74  | < <b>0.001</b> |

<sup>a</sup> Akaike Information Criterion (AIC) was used to determine which fixed factors (location, year, total length, mass, location × year) were included in the linear model.

Significant fixed factors are represented as bolded text. See Table S2 for gene abbreviations.

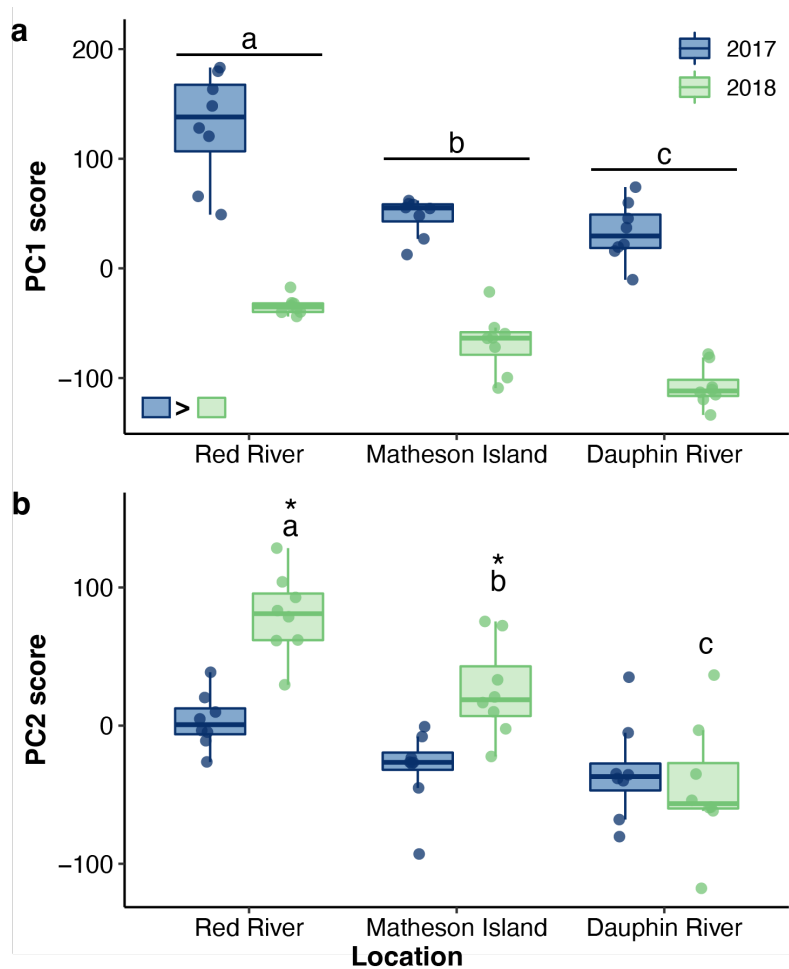

**Figure S1.** Principal component (PC) scores for PC1 (a) and PC2 (b) for whole-transcriptomic analysis of walleye (*Sander vitreus*) sampled in the Lake Winnipeg system in 2017 and 2018 ( $n = 8$ ). Walleye were sampled from the Red River, Matheson Island, and Dauphin River, representing sites in the south basin, channel, and north basin, respectively. Locations that do not share a letter are significantly different from one another. An asterisk represents a significant effect of year within a location, while the inset represents an overall significant effect of year across locations (two-way ANOVA; see text for details). Horizontal bars in the boxplot represent the median response value and 75%, 50%, and 25% quartiles. Whiskers represent  $\pm 1.5$  times the interquartile range, and each dot represents an individual response value.

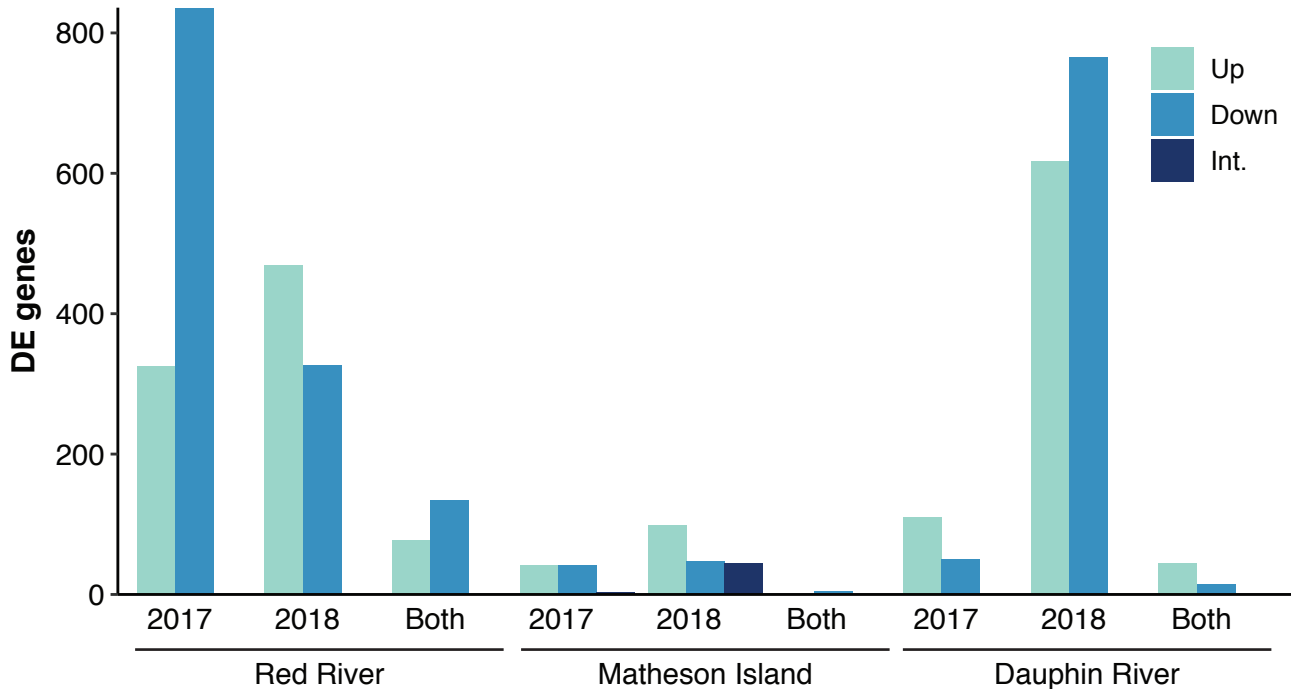

**Figure S2.** Number genes that were differentially expressed (DE) in walleye (*Sander vitreus*) from the Lake Winnipeg system in 2017 or 2018 only, or consistently across both years (Both). Walleye were sampled in the Red River, Matheson Island, and Dauphin River, representing sites in the south basin, channel, and north basin, respectively. Site comparisons represent differences of one site compared to the other two sites (i.e., Red River compared to both Matheson Island and Dauphin River; Matheson Island compared to both Red River and Dauphin River; Dauphin River compared to both Red River and Matheson Island). Genes are expressed in terms of their direction of regulation (up or down). Intermediate (int.) represents regulation in opposite directions relative to the two other sampling sites (e.g., for Matheson Island, up-regulated compared to Red River, down-regulated compared to Dauphin River).

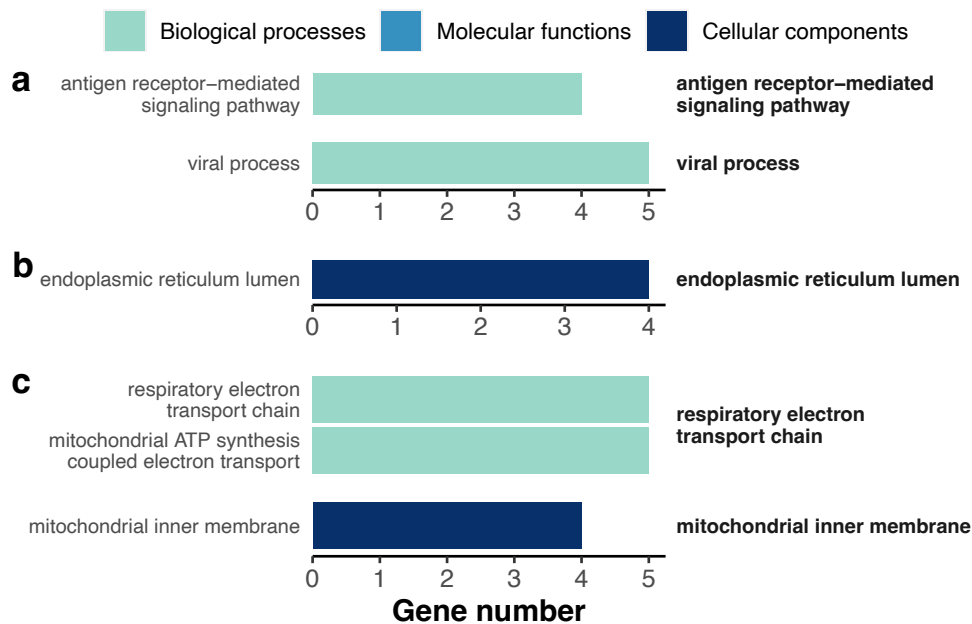

**Figure S3.** Summary of the enriched gene ontology (GO) terms of genes down-regulated in 2018 only for walleye (*Sander vitreus*;  $n = 8$ ) sampled from Matheson Island compared to Red River and Dauphin River. Genes were considered differentially regulated at a false discovery rate  $< 0.05$ . Only GO terms from the functional analysis with an adjusted  $p < 0.05$  with more than four transcripts were considered as significantly enriched. Significant GO terms were summarized using REVIGO to reduce redundancy and grouped according to similarity (right labels).

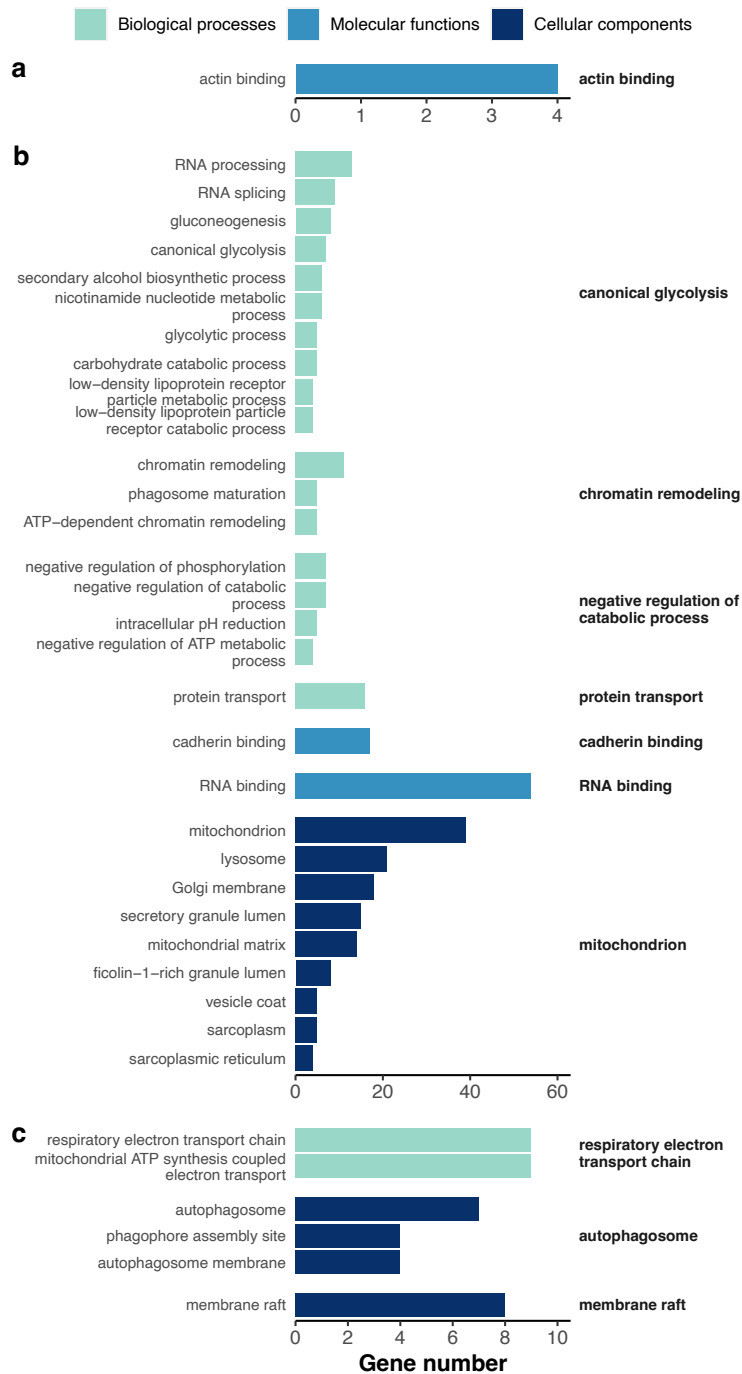

**Figure S4.** Summary of the enriched gene ontology (GO) terms of genes (a) up-regulated in both 2017 and 2018 as well as (b) up- and (c) down-regulated in 2018 only for walleye (*Sander vitreus*;  $n = 8$ ) sampled from Dauphin River compared to Red River and Matheson Island. Genes were considered differentially regulated at a false discovery rate  $< 0.05$ . Only GO terms from the functional analysis with an adjusted  $p < 0.05$  with more than four transcripts were considered as significantly enriched. Significant GO terms were summarized using REVIGO to reduce redundancy and grouped according to similarity (right labels).

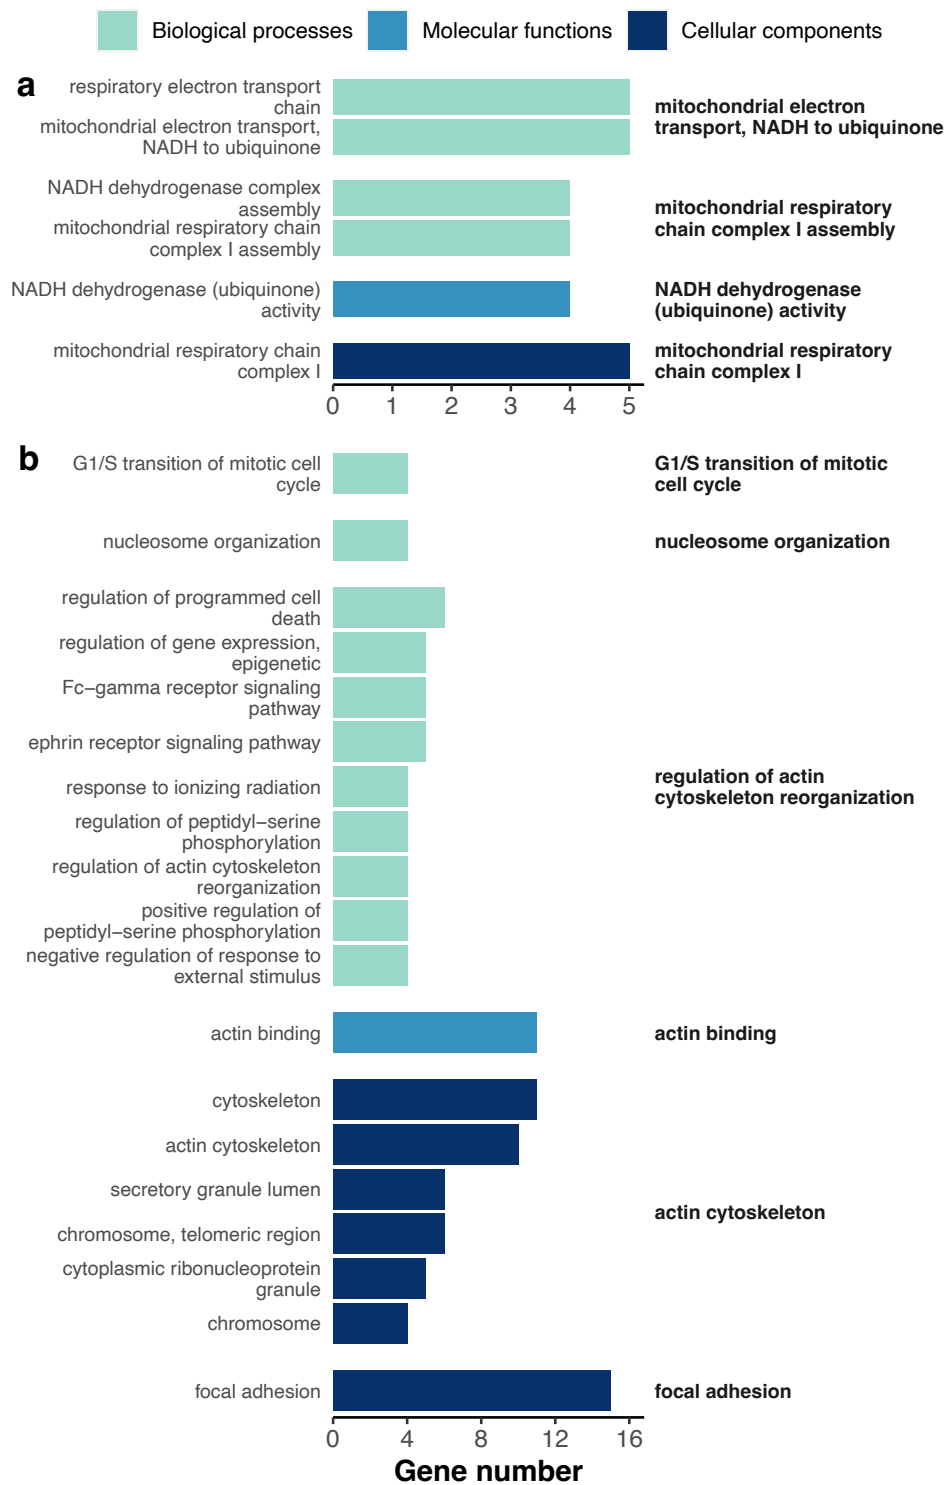

**Figure S5.** Summary of the enriched gene ontology (GO) terms of genes (a) up- and (b) down-regulated in both 2017 and 2018 for walleye (*Sander vitreus*;  $n = 8$ ) sampled from the Red River compared to Matheson Island and Dauphin River. Genes were considered differentially regulated at a false discovery rate  $< 0.05$ . Only GO terms from the functional analysis with an adjusted  $p < 0.05$  with at least four transcripts were considered as significantly enriched. Significant GO terms were summarized using REVIGO to reduce redundancy and grouped according to similarity (right labels).

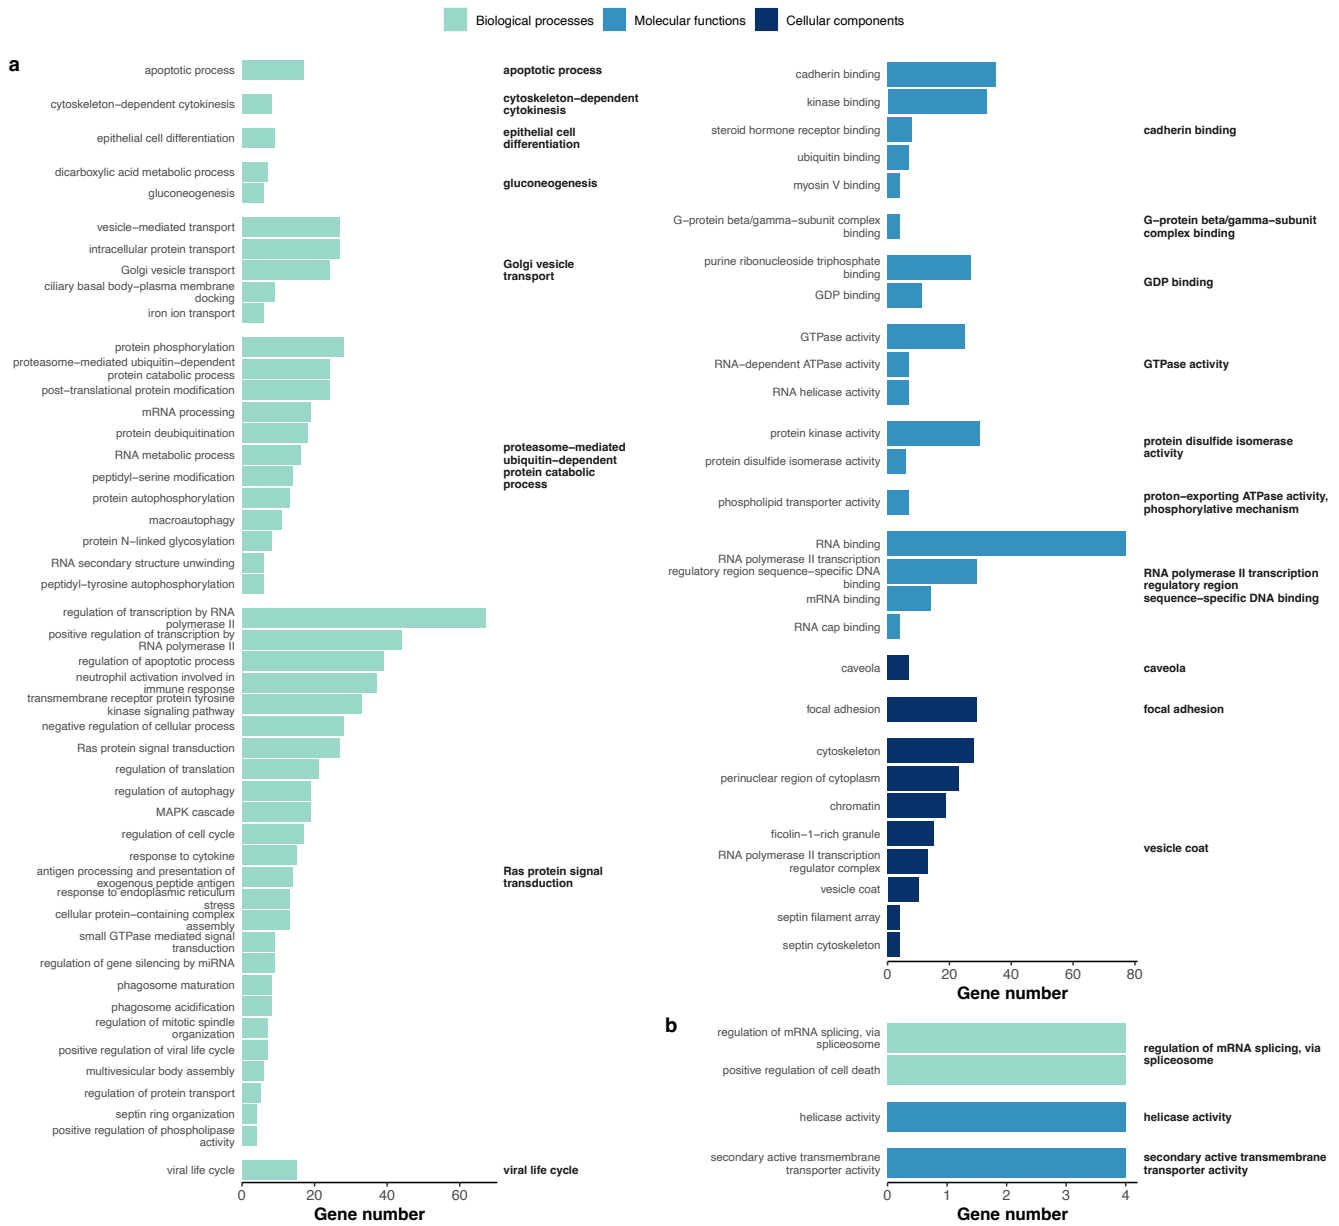

**Figure S6.** Summary of the enriched gene ontology (GO) terms of genes (a) down- and (b) up-regulated in 2017 only for walleye (*Sander vitreus*;  $n = 8$ ) sampled from the Red River compared to Matheson Island and Dauphin River. Genes were considered differentially regulated at a false discovery rate  $< 0.05$ . Only GO terms from the functional analysis with an adjusted  $p < 0.05$  with more than four transcripts were considered as significantly enriched. Significant GO terms were summarized using REVIGO to reduce redundancy and grouped according to similarity (right labels).



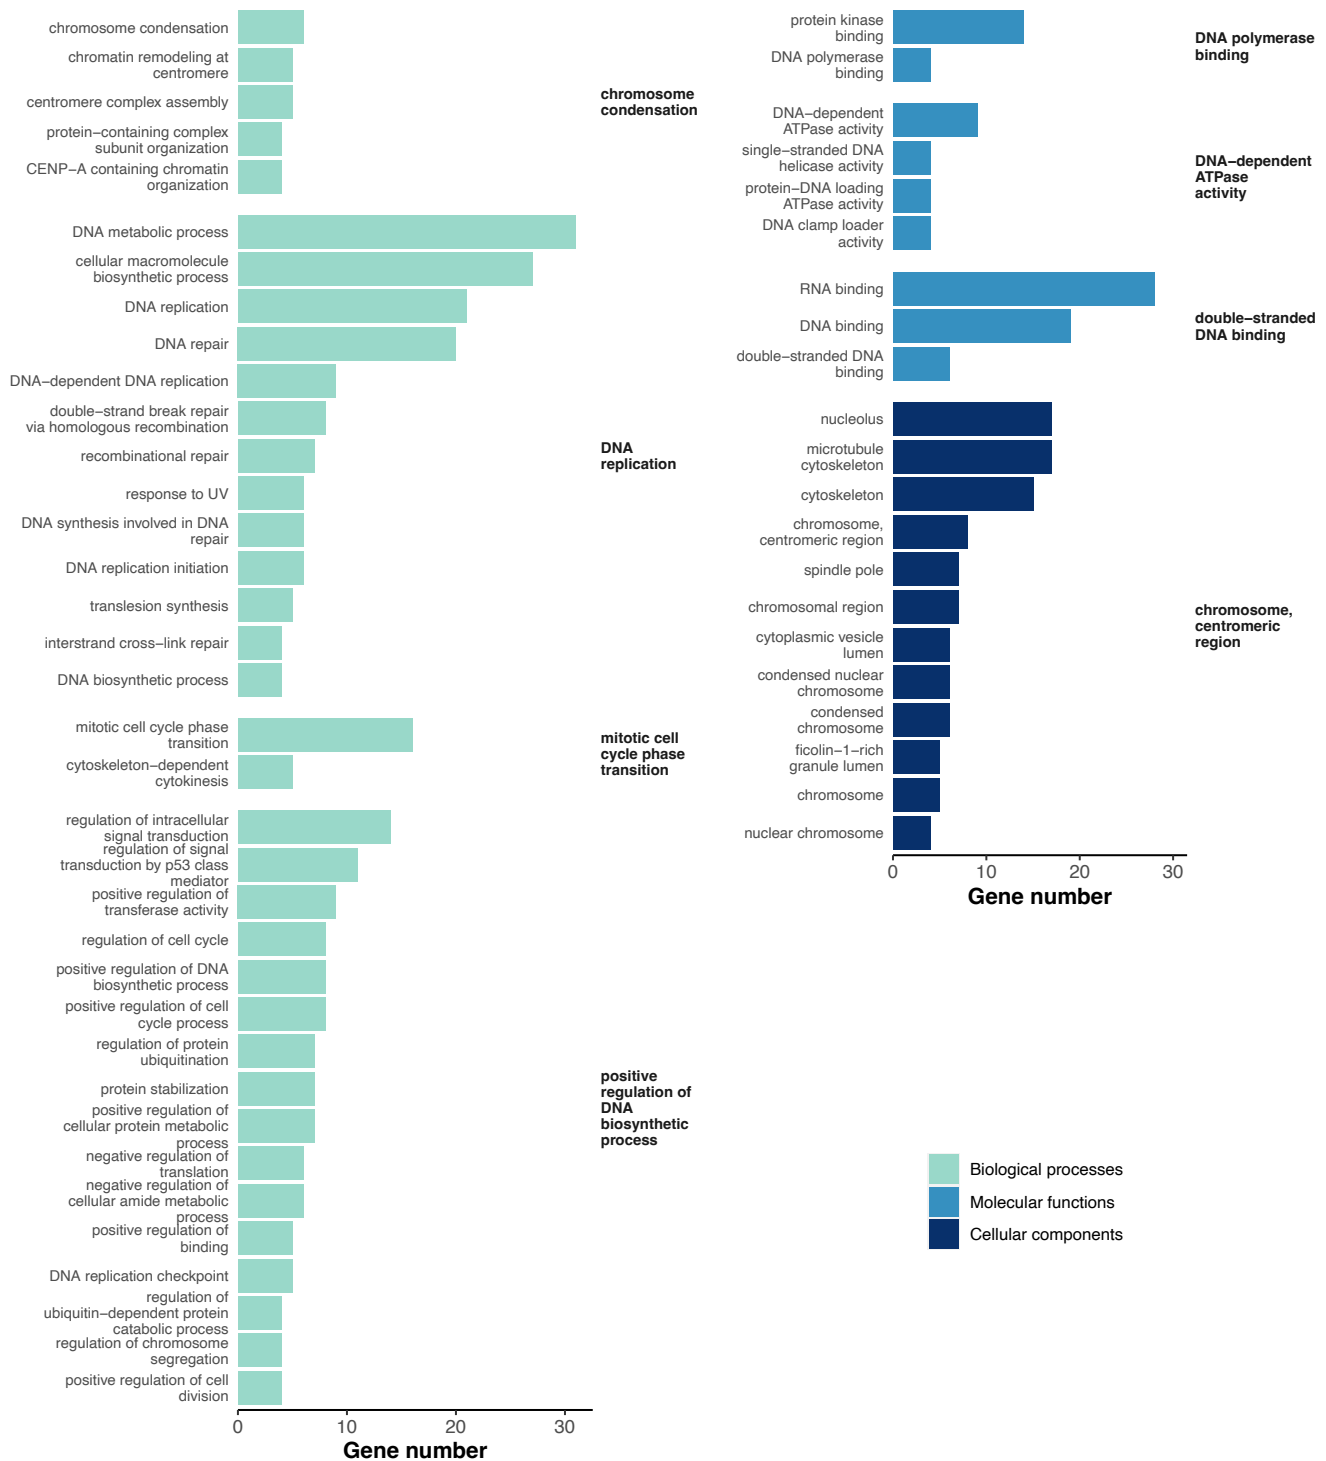

**Figure S7.** Summary of the enriched gene ontology (GO) terms of genes down-regulated in 2018 only for walleye (*Sander vitreus*;  $n = 8$ ) sampled from the Red River compared to Matheson Island and Dauphin River. Genes were considered differentially regulated at a false discovery rate  $< 0.05$ . Only GO terms from the functional analysis with an adjusted  $p < 0.05$  with more than four transcripts were considered as significantly enriched. Significant GO terms were summarized using REVIGO to reduce redundancy and grouped according to similarity (right labels).

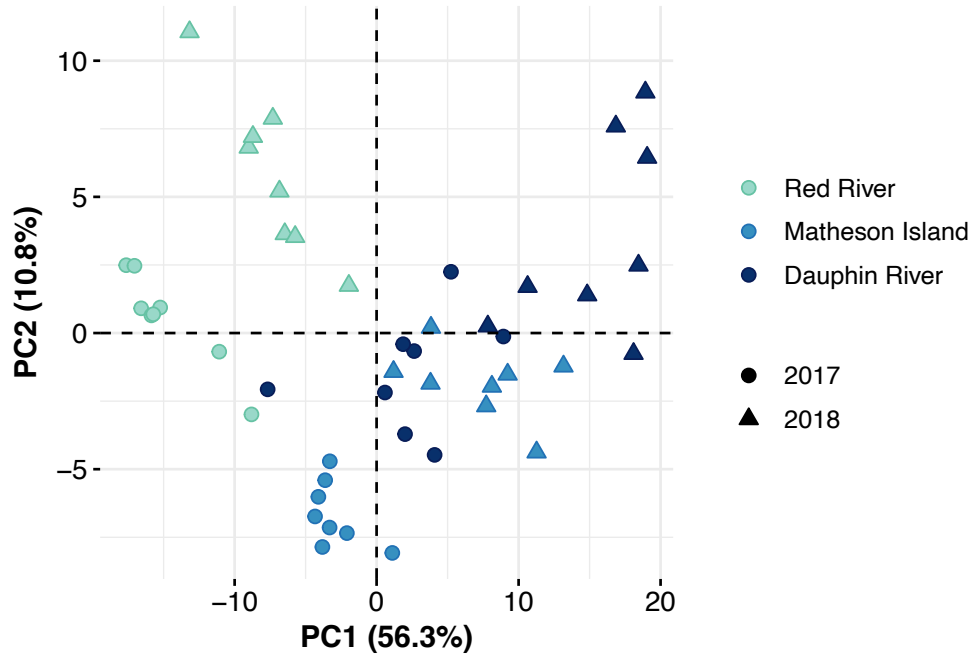

**Figure S8.** Principal components analysis (PCA) of the 195 annotated genes that were differentially regulated across both 2017 and 2018 in walleye (*Sander vitreus*) sampled in the Lake Winnipeg system. Walleye were sampled from the Red River, Matheson Island, and Dauphin River in 2017 and 2018 ( $n = 8$  per site and year), and genes that were differentially regulated ( $FDR < 0.05$ ) at one site compared to the other two sites were identified. The variance explained by each PC is indicated in brackets.

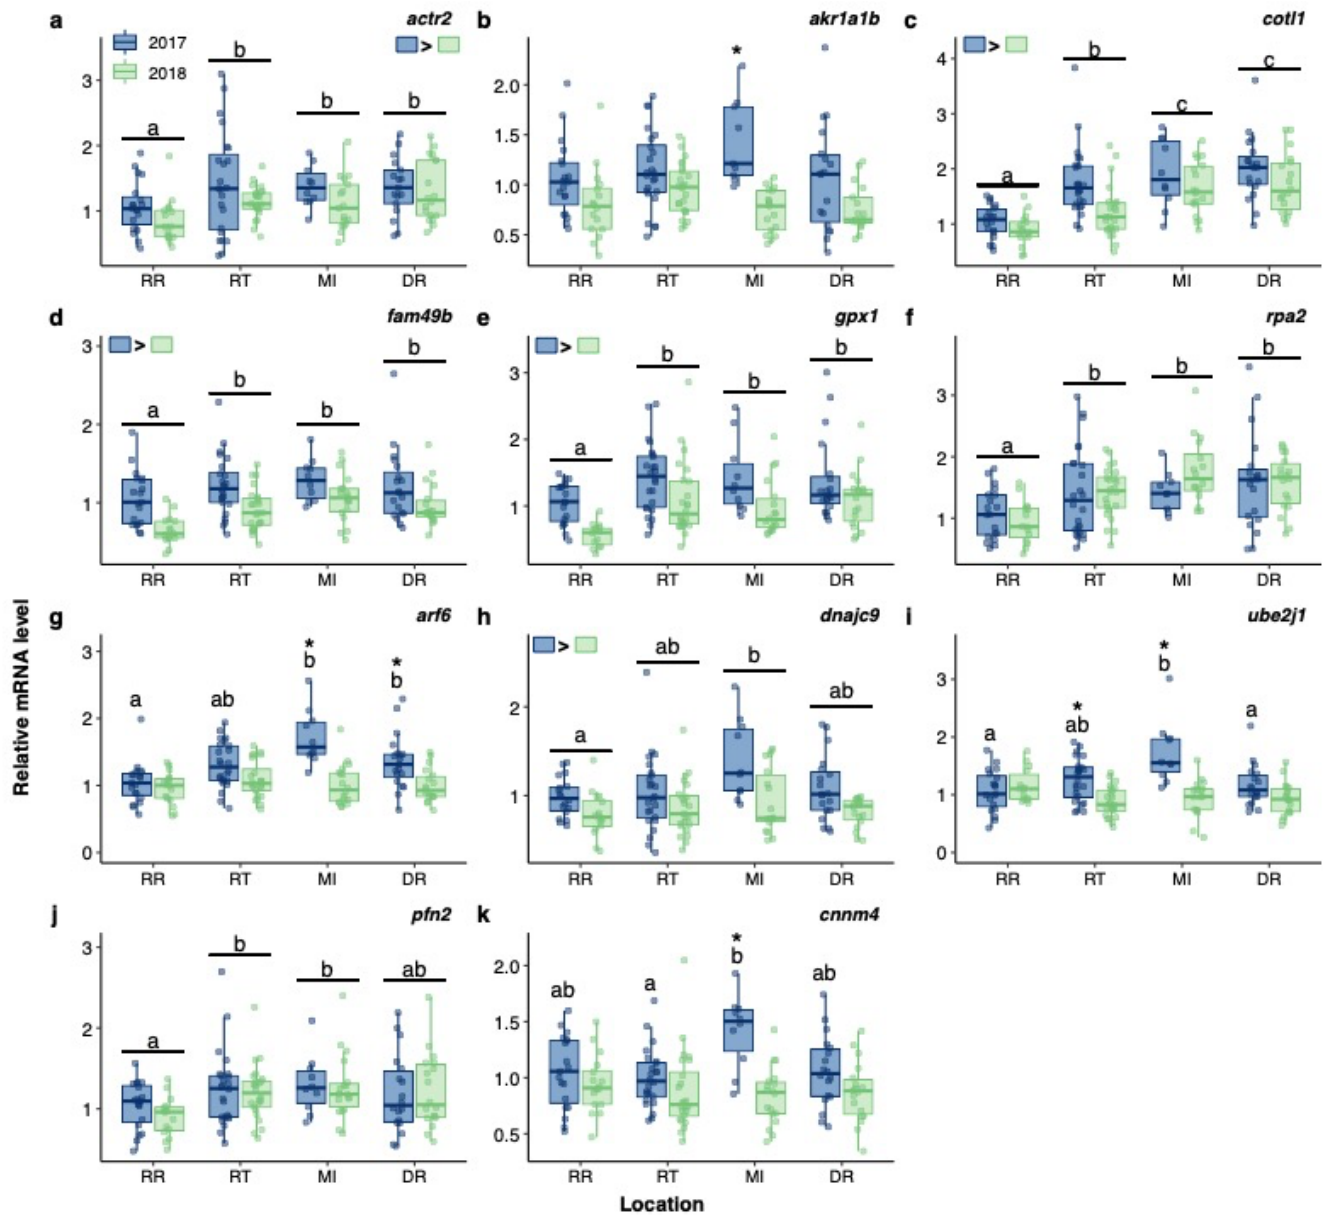

**Figure S9.** Relative mRNA levels for candidate genes of walleye (*Sander vitreus*) from the lake Winnipeg system. Walleye were sampled from the Red River (RR;  $n = 14-19$ ), Riverton (RT;  $n = 23-24$ ), Matheson Island (MI;  $n = 9-18$ ), and Dauphin River (DR;  $n = 17-19$ ) in 2017 and 2018. Locations that do not share a letter are significantly different from one another. An asterisk represents a significant effect of year within a location, while the inset represents an overall significant effect of year across locations (see Table S9). Horizontal bars in the boxplot represent the median response value and 75%, 50%, and 25% quartiles. Whiskers represent  $\pm 1.5$  times the interquartile range, and each dot represents an individual response value. See Table S2 for gene abbreviations.

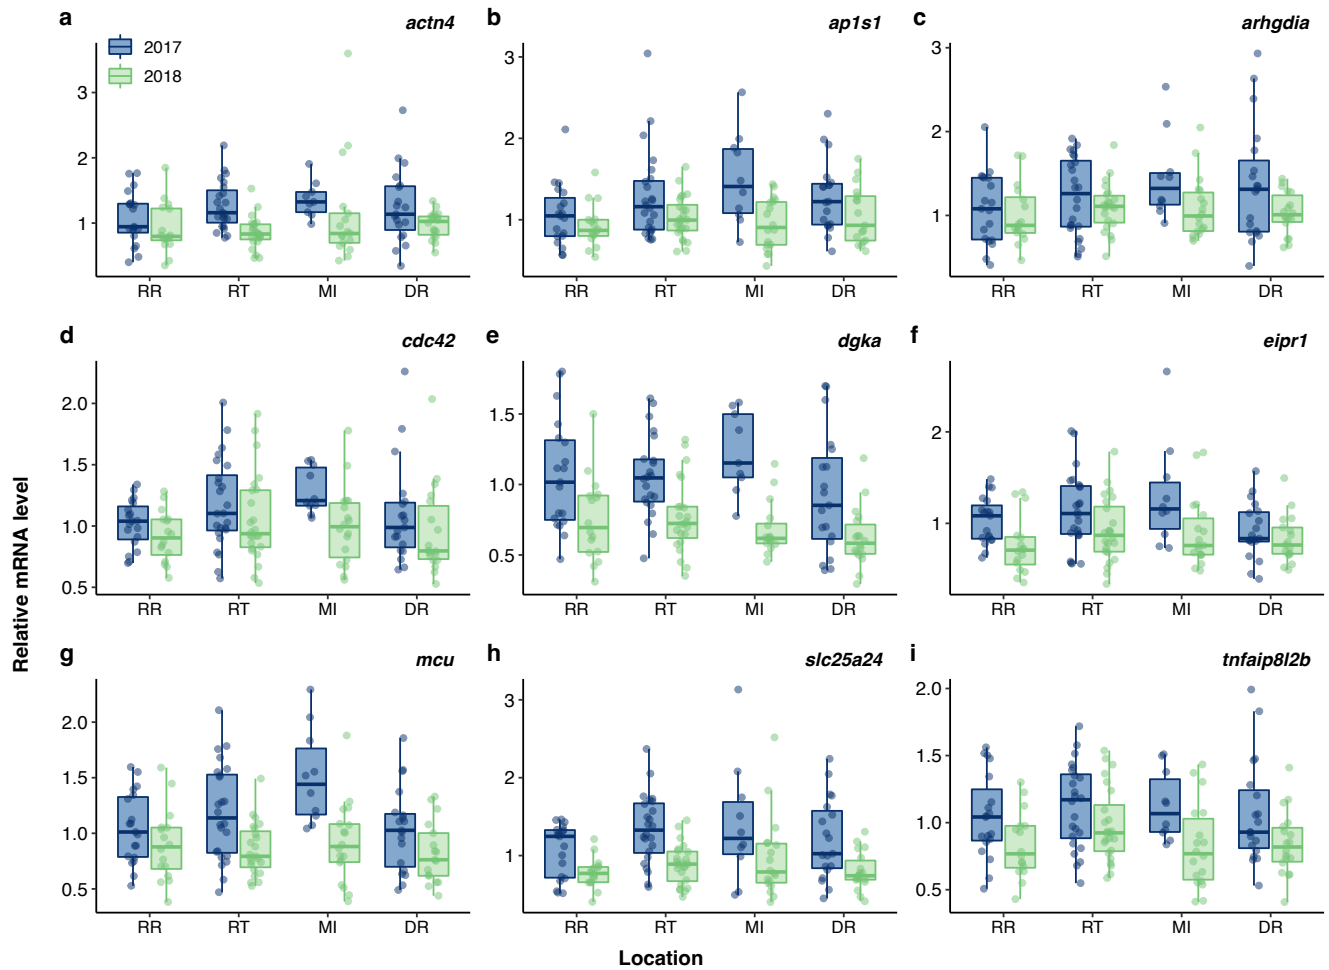

**Figure S10.** Relative mRNA levels for candidate genes of walleye (*Sander vitreus*) from the lake Winnipeg system. Walleye were sampled from the Red River (RR;  $n = 16-19$ ), Riverton (RT;  $n = 22-24$ ), Matheson Island (MI;  $n = 9-18$ ), and Dauphin River (DR;  $n = 17-19$ ) in 2017 and 2018. For each gene, there was a significant effect of year but not location (see Table S9). Horizontal bars in the boxplot represent the median response value and 75%, 50%, and 25% quartiles. Whiskers represent  $\pm 1.5$  times the interquartile range, and each dot represents an individual response value. See Table S2 for gene abbreviations.
